1 **Environmental Triggers of *IrgA* Expression in *Streptococcus mutans***

2

3 Ivan Ishkov<sup>a</sup>, Sang-Joon Ahn<sup>b</sup>, Kelly C. Rice<sup>c</sup>, Stephen J. Hagen<sup>a#</sup>

4

5 <sup>a</sup>Department of Physics, University of Florida, Gainesville, Florida, USA

6 <sup>b</sup>Department of Oral Biology, University of Florida, Gainesville, Florida, USA

7 <sup>c</sup>Department of Microbiology and Cell Science, Institute of Food and Agricultural  
8 Sciences, University of Florida, Gainesville, Florida, USA

9

10

11 Running Title: *IrgA* expression in *S. mutans*

12

13 Keywords: *Streptococcus mutans*, bimodality, ccpA, fluorescence, catabolite repression,  
14 two-component systems, gamma distribution

15

16

17 #Address correspondence to Stephen J. Hagen, [sjhagen@ufl.edu](mailto:sjhagen@ufl.edu)

18

19

## 20 **Abstract**

21           The *IrgAB* and *cidAB* operons of *Streptococcus mutans* encode proteins that are  
22 structurally similar to the bacteriophage lambda family of holin-antiholin proteins, which  
23 are believed to facilitate cell death in other bacterial species. Although their precise  
24 function is not known, *cidAB* and *IrgAB* are linked to multiple virulence traits of *S. mutans*,  
25 including oxidative stress tolerance, biofilm formation, and autolysis. The regulation of  
26 *cidAB* and *IrgAB* is still not understood, as these operons show opposite patterns of  
27 expression as well as a complex dependence on growth conditions. We have used a  
28 microfluidic approach, together with single-cell imaging of a fluorescent gene reporter, to  
29 identify with greater precision the cues that trigger *IrgA* expression and characterize cell-  
30 to-cell heterogeneity in *IrgA* activity. *IrgA* activates very abruptly at stationary phase, with  
31 a high degree of synchrony across the population. We find this activation is controlled by  
32 a small number of inputs that are sensitive to growth phase: Extracellular pyruvate,  
33 glucose, and molecular oxygen. Further, activation of *IrgA* appears to be self-limiting, so  
34 that *IrgA* is strongly expressed only for a very short interval of time. Consequently, *IrgA* is  
35 programmed to switch on briefly at the end of exponential growth, as glucose and  
36 molecular oxygen are exhausted and extracellular pyruvate is available. Our findings are  
37 consistent with studies showing that homologs of *IrgAB* are linked, together with *lytST*, to  
38 the reimport of pyruvate for anaerobic fermentative growth.

39

40

41

42

## 43 **Importance**

44           The function and regulation of *cidAB* and *IrgAB* in *Streptococcus mutans* is not  
45 understood, although these operons have been clearly linked to stress responses and  
46 they show a complex dependence on environmental inputs and growth phase. Identifying  
47 specific environmental cues that trigger activation of *IrgAB* has been difficult owing to the  
48 cells' own modification of key inputs such as glucose and oxygen: In *S. mutans* the *IrgAB*  
49 operon is strongly upregulated at the end of exponential phase, where growth conditions  
50 in a bulk culture become poorly defined. Here we have used microfluidics to apply precise  
51 control of environmental inputs to *S. mutans* and identify specific chemical cues that  
52 activate *IrgAB*. We find that rigorously anaerobic conditions and the presence of  
53 extracellular pyruvate are sufficient to induce *IrgAB* expression, suggesting that *IrgAB* is  
54 timed to activate just as pyruvate fermentation becomes favorable.

## 55 Introduction

56 The oral pathogen *Streptococcus mutans* (1) possesses two operons designated  
57 *cidAB* (SMU.1701/1700) and *IrgAB* (SMU.575/574) (2), which are closely homologous to  
58 the *IrgAB* and *cidAB* operons that have been extensively studied in organisms such as  
59 *Bacillus subtilis* and *Staphylococcus aureus* (3-10). Sequence homology indicates that  
60 *cidAB* and *IrgAB* encode membrane proteins that are similar to holin-antiholin membrane  
61 proteins of the bacteriophage lambda family (11-14), which control autolysis and cell  
62 death by modulating the permeability of the bacterial cell wall (10, 12, 13, 15, 16). In *S.*  
63 *mutans*, deletions in *cidAB* or *IrgAB* have been shown to affect virulence-related  
64 behaviors such as autolysis, genetic competence, antibiotic resistance, biofilm  
65 development, and response to heat and oxidative stresses (11, 17-20). Consequently  
66 *IrgAB* and *cidAB* have been viewed as potentially encoding an *S. mutans* holin-antiholin  
67 system that responds to conditions of environmental stress by triggering autolysis and  
68 cell death (11, 21). However the regulation of *cidAB* and *IrgAB* in *S. mutans* is complex,  
69 and the precise function of these genes has not yet been established (11, 17, 18).  
70 Expression of *S. mutans cidAB* and *IrgAB* appears linked to several two component signal  
71 transduction systems and to carbon catabolite repression, and these two operons display  
72 opposite patterns of expression during growth and maturation of a culture (11, 17, 18,  
73 22). The link to variable parameters such as carbohydrate and growth phase has made it  
74 difficult to identify specific cues that control the timing and extent of *IrgAB* and *cidAB*  
75 transcription. In addition, the kinetics and population heterogeneity of *S. mutans IrgAB*  
76 and *cidAB* expression have not been investigated. In this work we apply microfluidic and  
77 single-cell approaches to better define the environmental inputs and identify cues that

78 control *IrgAB*. We also characterize the temporal profile and cell-to-cell heterogeneity of  
79 the *IrgAB* response to these cues.

80 In *S. mutans* the *cid* operon consists of *cidA* (342 bp) and *cidB* (696 bp), which  
81 overlap by 4 nucleotides (11). The *Irg* operon includes *IrgA* (468 bp) and *IrgB* (732 bp)  
82 (11). Both *cidAB* and *IrgAB* are sensitive to glucose availability, although the two operons  
83 behave oppositely. When *S. mutans* grows in limited glucose (less than 20 mM), *IrgAB* is  
84 not strongly expressed until the onset of stationary phase (11, 22). Higher initial glucose  
85 concentrations, exceeding 20 mM, reduce the stationary phase expression of *IrgAB*. By  
86 contrast, *cidAB* is robustly expressed during early growth in high glucose concentrations,  
87 but is much less active later in growth or when initial glucose concentrations are less than  
88 about 20 mM (11, 22). Kim et. al. have recently identified a catabolite responsive element  
89 (*cre*-site) region in the promoters of *cidAB* and *IrgAB*, indicating that the catabolite  
90 repression protein CcpA may enhance or suppress *cidAB* and *IrgAB* expression during  
91 early and late growth stages respectively (22).

92 Several studies have found that *cidAB* and *IrgAB* respond to molecular oxygen,  
93 and that deletions in either operon affect the ability of *S. mutans* to tolerate oxidative  
94 stress (2, 11). The  $\Delta IrgAB$  and  $\Delta cidAB$  deletion strains did not grow under aerobic  
95 conditions, although their anaerobic growth was reported similar to wild type (11).  
96 Similarly,  $\Delta IrgAB$  and  $\Delta cidAB$  strains were unusually sensitive to superoxide anion  
97 (generated by paraquat) although not to hydroxyl radical (generated by hydrogen  
98 peroxide) (11). Microarray experiments indicated that *IrgA* transcription increased in the  
99 presence of molecular oxygen during exponential growth phase (2). A transcriptional  
100 profiling study found that *IrgAB* transcription at 0.4 OD in a culture grown aerobically was

101 11-fold higher than in a culture grown in an anaerobic chamber (2). Furthermore, the  
102 deletion of *vicK* (18), which through its PAS domain may play the role of a redox sensor  
103 in the VicRK two component system, was found to suppress the late-growth onset of  
104 *IrgAB* expression (18, 23-25). *IrgA* and *IrgB* were also upregulated in thicker biofilms,  
105 perhaps suggesting sensitivity to oxygen conditions or other environmental stresses  
106 within the biofilm (6, 26-28).

107 The LytST two component system also plays a role in *IrgAB* regulation in *S.*  
108 *mutans*, in which the *lytST* operon is located 175 nucleotides upstream of *IrgAB* (11).  
109 LytST and its homologs have been closely linked to regulation of *IrgAB* homologs in many  
110 bacteria, including *Bacillus* and *Staphylococcus* species as well as *S. mutans* (3, 6, 8, 11,  
111 17, 29). In *S. mutans* the deletion of *lytST* or *lytS* reduced *IrgAB* expression throughout  
112 the growth curve and either eliminated (11) or sharply suppressed (17) the  $10^3$ - $10^4$  fold  
113 increase in *IrgAB* mRNA levels that occurs late in the growth curve under low glucose  
114 conditions (11). This modulation of *IrgAB* induction by *lytS* was slightly greater at low  
115 oxygen conditions (17), possibly indicating a link between LytST and environmental  
116 oxygen in regulation of *IrgAB*.

117 These prior findings show that growth-phase sensitive parameters such as glucose  
118 and oxygen interact to regulate *IrgAB* and may contribute to the suppression of *IrgAB* until  
119 the onset of stationary phase. Understanding this regulation in detail requires a greater  
120 degree of environmental control than is achieved through conventional, bulk culture  
121 methods. For this reason, we have used a microfluidic approach to maintain precise  
122 control of the environmental inputs that are suspected to influence *S. mutans IrgAB*, and  
123 to explore the population profile and kinetics of *IrgAB* expression at the individual cell

124 level. By imaging and quantifying activity of a green fluorescent protein reporter for the  
125 *IrgAB* promoter in individual *S. mutans* under controlled flow conditions, we are able to  
126 identify the environmental inputs that trigger activation of *IrgAB*.

127

## 128 **Results**

129 *A burst of IrgA activity coincides with the onset of stationary phase*

130 To test our *PIrgA-gfp* fluorescent reporter strain and characterize *IrgA* expression  
131 in static cultures, we monitored the optical density and fluorescence of the reporter strain  
132 growing in well plates containing defined medium (FMC (30, 31)) that was prepared with  
133 different initial concentrations of glucose. Figures 1A and 1B show growth curves for the  
134 UA159 background and the *PIrgA-gfp* reporting strain respectively, growing anaerobically  
135 under a layer of mineral oil. Figures 1C and 1D show the green fluorescence (485 nm  
136 excitation, 528 nm emission) of the two strains. For both strains, the growth medium  
137 contributes a large background fluorescence that declines steadily as the culture grows.  
138 In *PIrgA-gfp* however, the green fluorescence increases abruptly above background as  
139 the culture enters stationary phase (arrows in Figure 1D), signaling a strong burst of *IrgA*  
140 expression. This rapid rise in green fluorescence is transient, as the green fluorescence  
141 at later times declines slowly, like that of the UA159 background. The brief duration of the  
142 *IrgA* expression burst is apparent from the time-derivative of the fluorescence signal.

143 Comparing Figures 1E and 1F shows that the fluorescent reporter for *IrgAB* is activated  
144 for no more than 30-50 minutes at the onset of stationary phase.

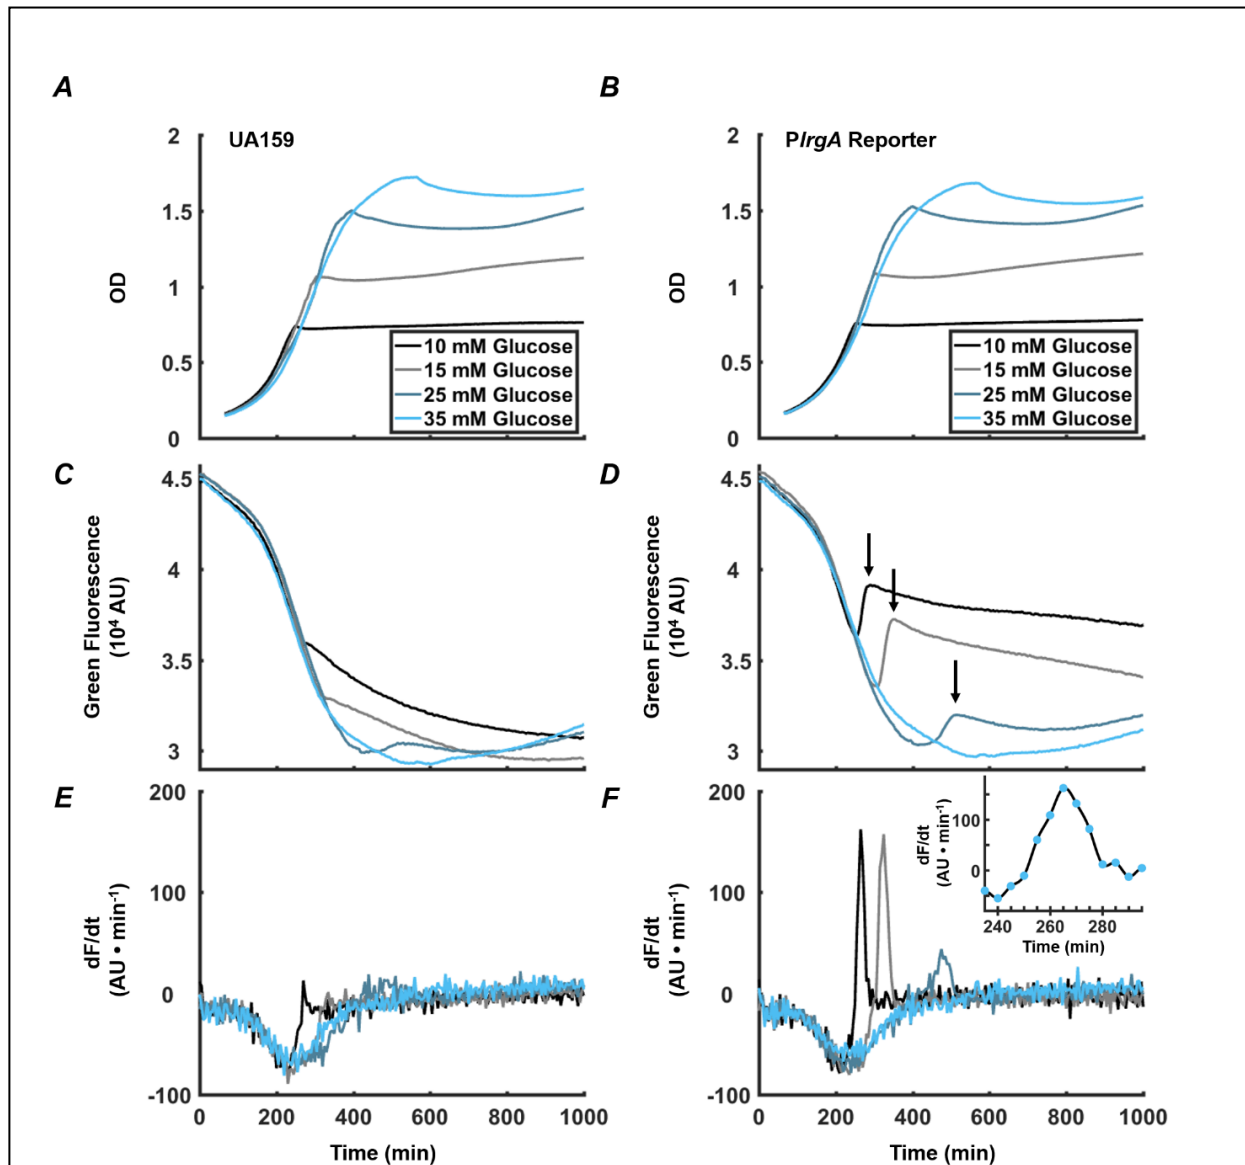

**Figure 1:** Observation of *PlrgA-gfp* fluorescence at the onset of stationary phase in *S. mutans*. Optical density of (A) UA159 background and (B) *PlrgA-gfp* strain growing in defined medium. Green fluorescence of (C) UA159 and (D) *PlrgA-gfp* cultures is dominated by the steadily declining fluorescence of the medium, until about 250-300 minutes. The black arrows in (D) mark the abrupt burst of fluorescence in the *PlrgA-gfp* strain at the onset of stationary phase. Comparison of the time derivatives of the green fluorescence for (E) UA159 and (F) *PlrgA-gfp* shows that the burst of *IrgA* expression has a duration of 30-50 minutes. The inset in (F) shows the time derivative of reporter fluorescence in 10 mM glucose.



145 Figure 1D also shows that the initial glucose concentration of the medium  
146 influences the overall amount of *IrgA* expression that occurs during the burst. The size of  
147 the fluorescence rise in Figure 1D increases as the initial glucose is raised from 10 mM  
148 to 15 mM, but declines as the initial glucose is further raised to 25 mM. At 35 mM initial  
149 glucose, the burst is not detected. These data are consistent with transcriptional data  
150 showing that *IrgAB* is upregulated  $10^3$ - $10^4$  fold in late exponential phase, relative to early  
151 or mid-exponential phase (11), and that very high initial glucose concentrations suppress  
152 this upregulation (11, 22).

153 *The burst of IrgA expression is observed only under anaerobic conditions*

154 Prior studies have found interplay between *IrgAB* expression and molecular  
155 oxygen or oxidative stresses (11, 17, 18, 23-25). To more carefully assess the relationship  
156 between aerobic or anaerobic conditions and glucose availability on *IrgAB*, we measured  
157 the size of the stationary phase burst of reporter fluorescence in well plates that were  
158 growing anaerobically (with a mineral oil layer) or aerobically (open to air), with different  
159 glucose concentrations. Figure 2 shows that, under anaerobic conditions, increasing the  
160 initial glucose to about 10 mM increases the amplitude of the *IrgA* expression burst.  
161 However, this amplitude falls monotonically if initial glucose is further increased. In *P<sub>IrgA</sub>-*  
162 *gfp* cultures grown aerobically, we observed no burst of *IrgA* expression at any initial  
163 glucose concentration. Therefore, the burst of *IrgA* expression that occurs in a static  
164 culture requires anaerobic conditions as well as a moderately low initial glucose  
165 concentration. However, lower glucose concentration does not ensure higher *IrgA*

166 expression; Figure 2C shows that the amplitude of the fluorescence burst declines at  
167 initial glucose concentrations smaller than about 10 mM.

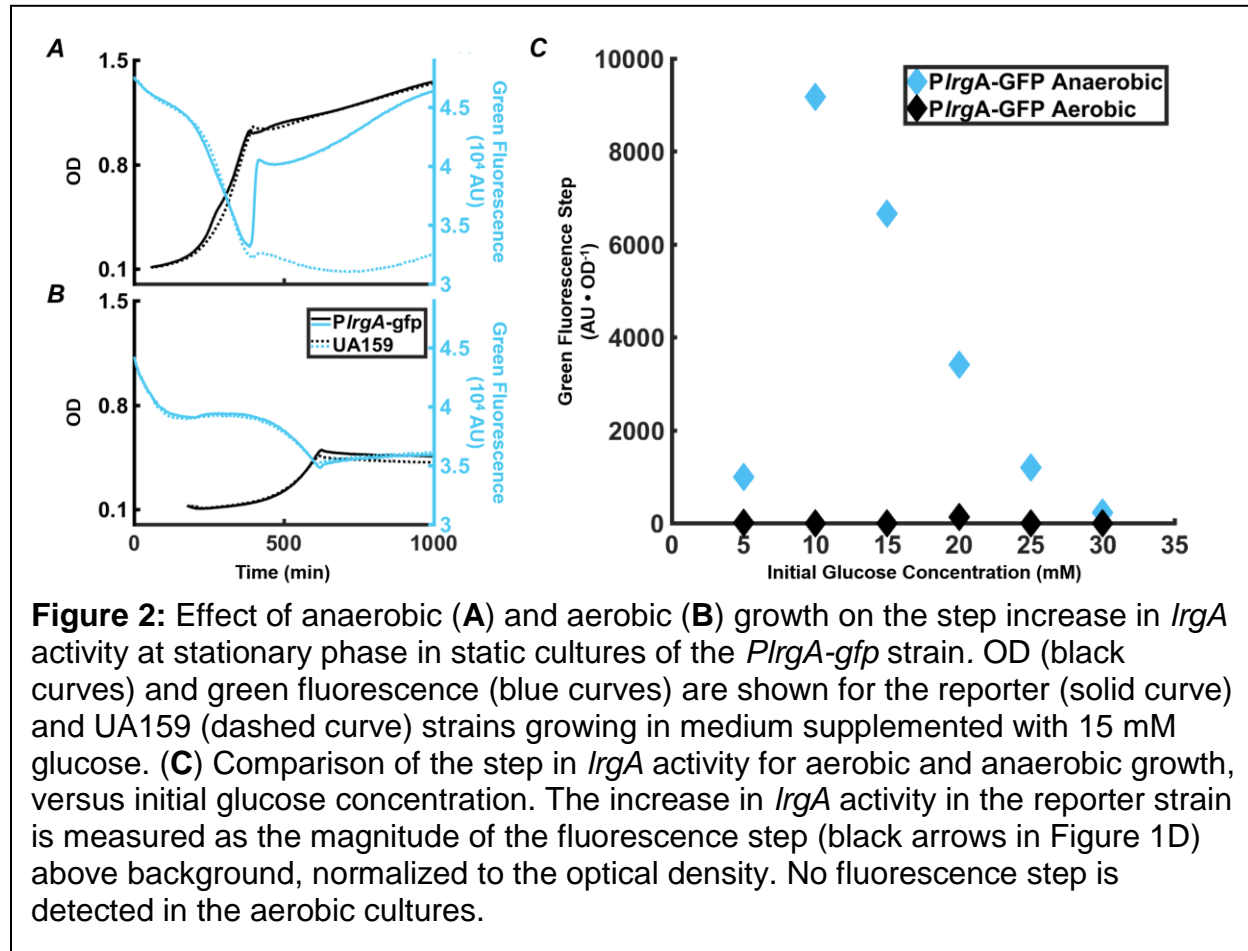

168

169 *Extracellular pyruvate affects stationary phase expression of IrgA*

170 Recent findings that the LytST family of two component systems, which modulate  
171 the expression of *IrgA* homologs, can bind and sense external pyruvate (8, 10, 32), and  
172 the observation that the pyruvate dehydrogenase complex in *S. mutans* is upregulated in  
173 late exponential phase (22), suggest that late growth expression of *IrgAB* in *S. mutans*  
174 may be connected to the presence of external pyruvate. We monitored the *PlrgA-gfp*

175 reporter strain growing anaerobically in defined medium to which different concentrations  
176 of initial glucose and pyruvate were added. Figure 3 shows that very low concentrations  
177 of pyruvate (0 – 0.1 mM) had little effect on the magnitude of the step increase in GFP  
178 fluorescence at the onset of stationary phase, regardless of glucose concentration.  
179 However, further increases in pyruvate to 1.5 – 8 mM generally enhanced the stationary  
180 phase response of *IrgAB*, especially for cells growing at low glucose, 15 mM or less.  
181 Higher levels of pyruvate sharply reduced the activation of *IrgA*, until the fluorescence

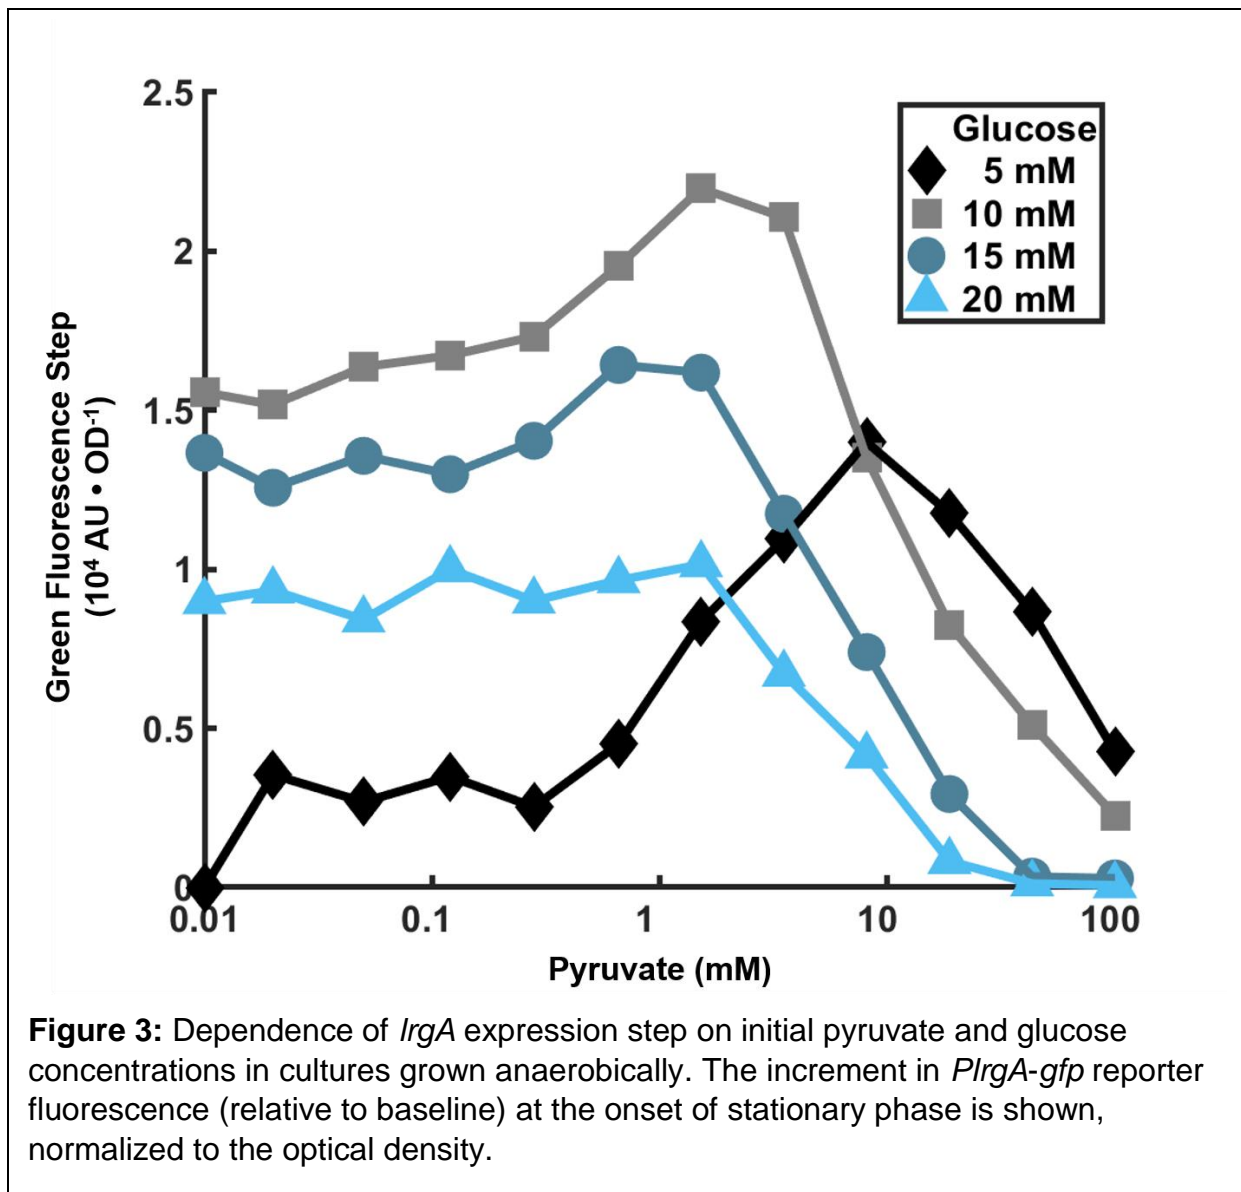

182 burst became undetectable at 100 mM pyruvate. These data show that initial glucose and  
183 pyruvate concentrations constitute a pair of external inputs that can modulate and  
184 maximize the stationary phase burst in *IrgA*, although both are inhibitory at higher  
185 concentrations.

### 186 *Expression of IrgA in bulk cultures at stationary phase is heterogeneous*

187 The very rapid burst of *P<sub>IrgA</sub>-gfp* fluorescence in Figure 1E shows that the timing  
188 of *IrgAB* activation is highly uniform in a population of cells. To test whether the level of  
189 activation is equally homogeneous, we measured the fluorescence of individual *P<sub>IrgA</sub>-*  
190 *gfp* cells extracted from a static, bulk culture at different times during growth. We grew  
191 cultures anaerobically in defined medium prepared with 15 mM (initial) glucose, withdrew  
192 cells periodically, dispersed them on a glass slide, and imaged them in phase contrast  
193 and GFP fluorescence on an inverted microscope. Figure 4A shows that cells showed  
194 very little fluorescence through exponential phase, up through about eight hours. At nine  
195 hours, as the cells entered stationary phase, pronounced *IrgA* reporter fluorescence was  
196 observed (Figure 4B).

197 The GFP fluorescence after activation was highly variable from cell to cell, as  
198 shown by the histograms of individual cell GFP fluorescence in Figure 4C. While the  
199 histograms remain generally similar through exponential phase (roughly 3 to 8 hours  
200 following inoculation), the heterogeneity in *IrgA* activation at 9 hours is substantially  
201 greater. The median cell fluorescence at 9 h is roughly 7-fold greater than at 8 h, while  
202 the brightest cells at 9 h are roughly 10-fold brighter than the brightest cells at 8 h. The  
203 9 h distribution has a slightly double-peaked (bimodal) character, suggesting that a  
204 subpopulation of cells have activated *P<sub>IrgA</sub>* while other cells have not. The distribution

205 narrows only slightly by 10 h, indicating that GFP concentrations in the population change  
206 little during stationary phase. This finding is consistent with Figures 1D and 1F, where the  
207 burst of *IrgA* expression lasts less than one hour. Although the tight temporal synchrony

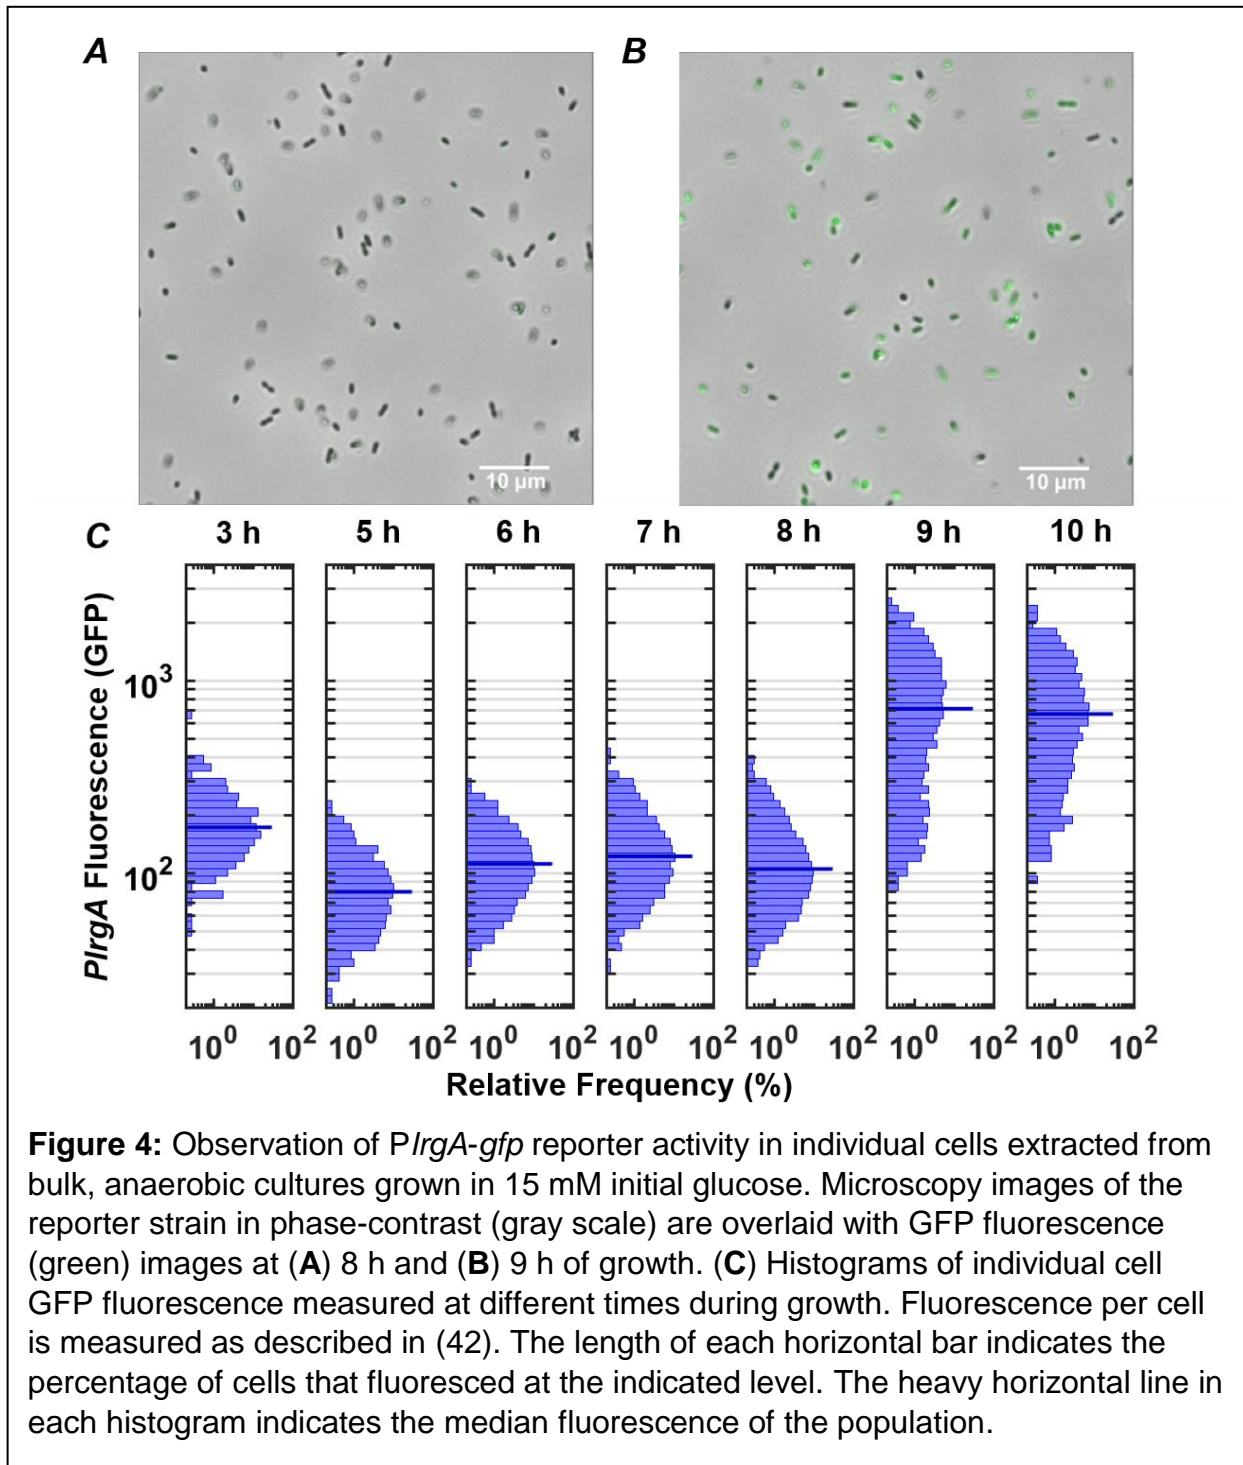

208 of *IrgA* expression suggests that a single external cue triggers *IrgA* throughout the culture,  
209 the population variability in the resulting level of *Irg* expression indicates that not all cells  
210 in the static culture were immediately induced, or that the *IrgAB* operon is not so tightly  
211 regulated as to enforce a consistent response among cells once induced.

### 212 *Activation of IrgA in controlled flow requires pyruvate and deoxygenation*

213 The observation that high initial glucose concentrations suppress the activation of  
214 *IrgAB* at the onset of stationary phase suggests that the *IrgAB* expression burst may be  
215 triggered by the exhaustion of glucose from the growth medium and the alleviation of  
216 catabolite repression of *IrgAB*. However, Figure 2 and Figure 3 also show a role for  
217 molecular oxygen, possibly in combination with extracellular pyruvate. A difficulty with  
218 using bulk, static cultures to study how these inputs affect *IrgA* is that they are altered by  
219 the growth and maturation of the culture; once a static culture is allowed to grow to  
220 stationary phase, the chemical environment of the cells is poorly defined. To identify more  
221 precisely the factors that trigger *IrgAB* we used microfluidic flow channels to apply a stable  
222 flow of fresh, defined medium to cells that were under continuous observation. We loaded  
223 *P<sub>IrgA</sub>-gfp* cells into microfluidic flow channels (*Methods*) on a microscope stage and  
224 supplied a continuous flow of fresh, defined medium through each channel. The flow rate  
225 of 20  $\mu\text{l}/\text{h}$  ensured that the 1.7  $\mu\text{l}$  volume of medium within each channel was replaced  
226 every 5.1 minutes. This flow prevents the cells adhered in the channels from modifying  
227 their chemical environment.



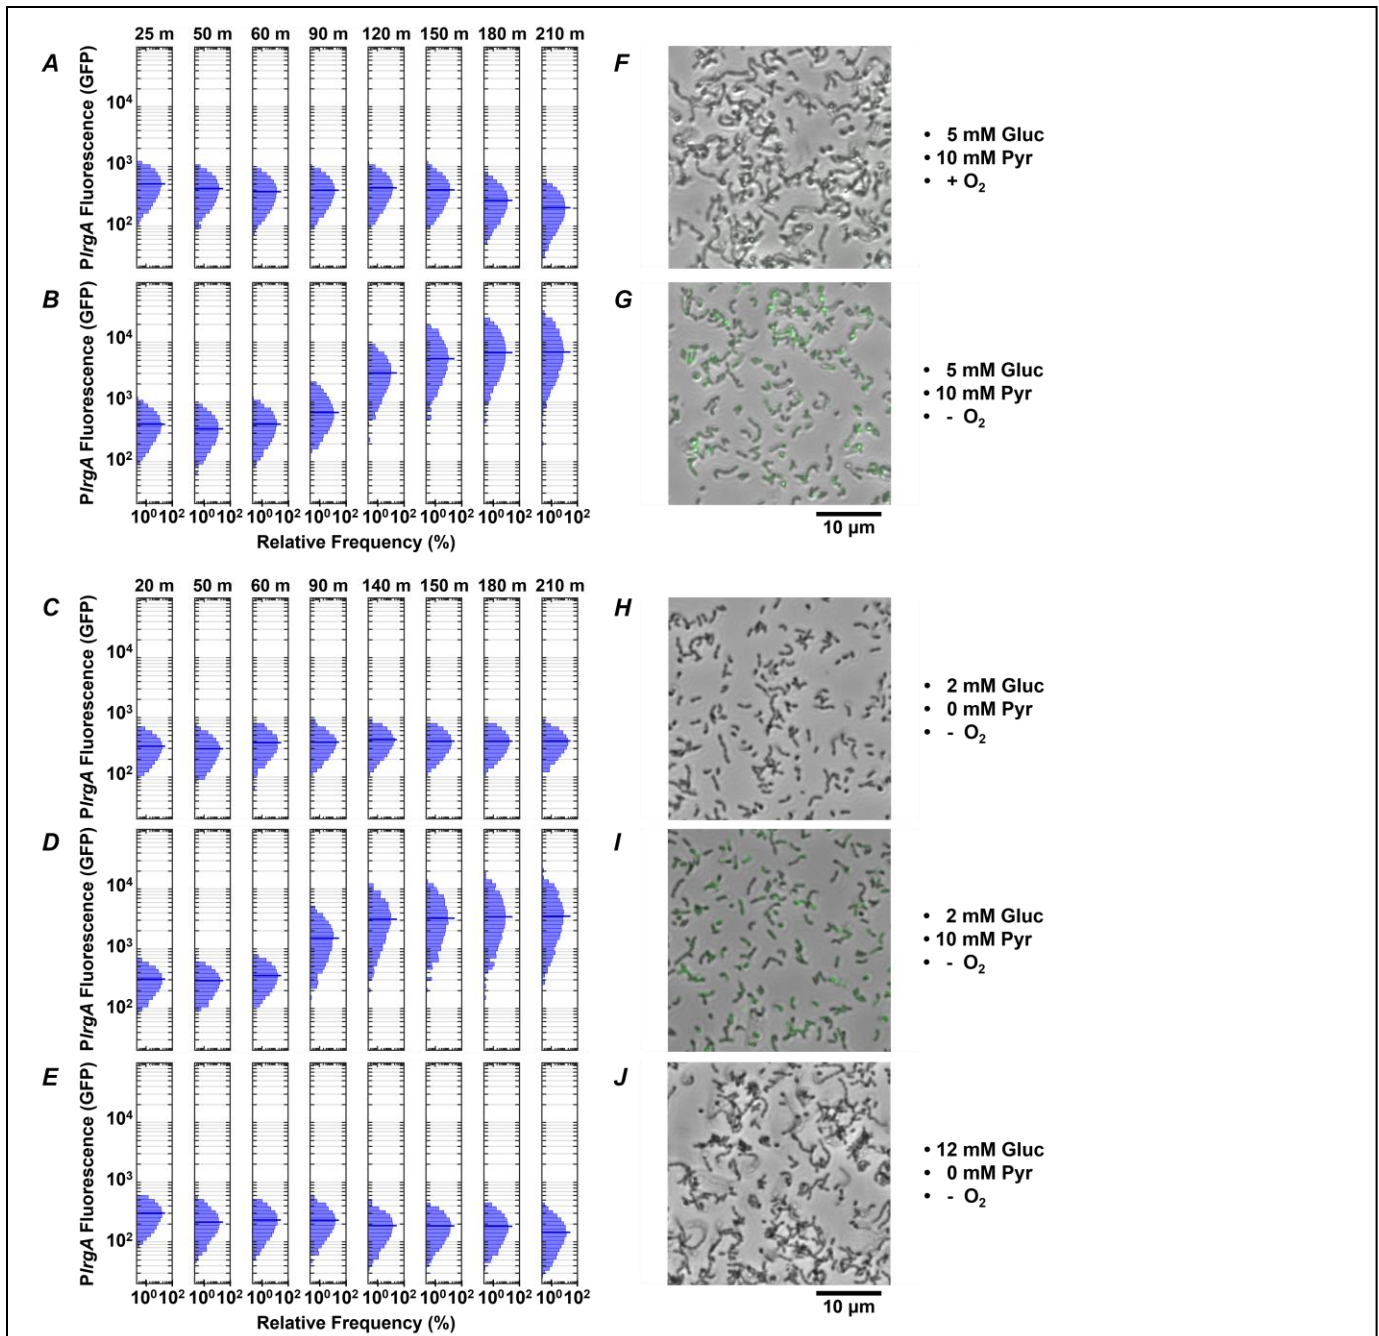

**Figure 5:** Effect of  $O_2$ , glucose and pyruvate on a *P/lrgA-gfp* reporter in flowing medium. The histograms show the green fluorescence of individual cells adhered within microfluidic channels and subject to a steady flow of fresh, defined medium: **(A)** aerobic medium containing 5 mM glucose / 10 mM pyruvate; **(B)** anoxic medium containing 5 mM glucose / 10 mM pyruvate; **(C)** anoxic medium containing 2 mM glucose (no added pyruvate); **(D)** anoxic medium containing 2 mM glucose / 10 mM pyruvate; **(E)** anoxic medium containing 12 mM glucose (no added pyruvate). **(F-J)** Phase microscopy images (collected at 150 minutes) of the reporter strain are shown in gray scale, overlaid with GFP fluorescence (green) images.

229 (aerobic) defined medium containing 5 mM glucose and 10 mM pyruvate. Expression of  
230 *IrgAB* remained at basal levels throughout the experiment. (A modest decline in the  
231 average fluorescence at 180 and 210 minutes is an artifact of rampant growth affecting  
232 the image analysis algorithm). Similar flow experiments using medium that was either  
233 fully aerated, or partially deoxygenated by stirring in vacuum or under N<sub>2</sub>, produced GFP  
234 histograms very similar to Figure 5A (data not shown): No activation of *IrgA* was observed  
235 in flow experiments at any combination of glucose and/or pyruvate concentrations when  
236 the supplied media were aerobic or partially deoxygenated.

237 We therefore tested whether more rigorous deoxygenation was needed to mimic  
238 the conditions of a static, anaerobic (mineral oil layer) well plate and induce a response  
239 from *IrgAB*. Figures 5B and 5D show the results when the growth medium was made  
240 stringently anoxic by the addition of an enzymatic system that scavenges molecular  
241 oxygen (*Methods*). These highly anoxic media induced robust expression of *IrgAB*: Strong  
242 GFP production was observed after 90-120 minutes of flow of anoxic medium that  
243 contained 5 mM glucose and 10 mM pyruvate (Figure 5B), or 2 mM glucose / 10 mM  
244 pyruvate (Figure 5D). (The first 50 minutes of the 90-120 minute delay is attributable to  
245 replacement of partially deoxygenated medium that was initially present in the flow  
246 connections.)

247 These data demonstrate that rigorous deoxygenation is a condition for the *IrgAB*  
248 reporter to activate in a continuous flow experiment. We therefore tested whether  
249 pyruvate was also required. Anoxic medium containing 2 mM (Figure 5C) or 12 mM  
250 (Figure 5E) glucose, without added pyruvate, did not activate *IrgA*. In summary, strong  
251 upregulation of *IrgA* was only achieved under continuous flow conditions when the



252 supplied medium was rigorously deoxygenated and contained added pyruvate. Once  
253 these conditions were present, the concentration of glucose (over the range 2-5 mM) had  
254 only modest additional effect on *IrgAB* activity. After 150 minutes in supplied medium,  
255 microscopy images in Figures 5G, 5I show cells with an activated *IrgAB* reporter (green),  
256 distinctly brighter than cells growing in aerobic or non-pyruvate media (Figures 5F, H, J).

257 The activation of *IrgAB* in the flow conditions of Figures 5B and 5D was slightly  
258 stronger (relative to baseline), and with a narrower population distribution, than in the  
259 static medium study of Figure 4C. In the deoxygenated flow study, the median brightness  
260 of activated cells was about 10-fold greater than the unactivated (baseline), whereas in a  
261 static, bulk culture the median activation was only 6-7 fold greater than the unactivated  
262 baseline. The 210 minute histograms in Figures 5B and 5D lack the very broad,  
263 heterogeneous *IrgAB* expression that is seen in the activated (9 h) cells in Figure 4C.

264 *Deletion of ccpA does not eliminate burst expression of IrgA*

265 The above data strongly suggest that either molecular oxygen or glucose inhibits  
266 *IrgA* activation until the conclusion of exponential growth. Because a *cre*-site for the  
267 catabolite repressor protein CcpA was recently identified (22) in the *IrgA* promoter region,  
268 we investigated a possible role for CcpA in suppressing *IrgAB* activity. We compared  
269 expression of a *P<sub>IrgA</sub>-gfp* reporter in the wild type background and in a  $\Delta$ *ccpA* strain, both  
270 growing anaerobically, for a range of glucose concentrations. Figures 6A and 6B show a  
271 similar abrupt onset of *IrgAB* expression at the beginning of stationary phase in the *ccpA*  
272 deletion. In Figure 6C the amplitude of the expression step is larger in the *ccpA* deletion  
273 than in UA159 background, where the relative effect is larger at low initial glucose levels.

274 Therefore, although catabolite repression may partially inhibit the magnitude of the  
275 expression burst, it evidently does not control the timing of the burst.

276

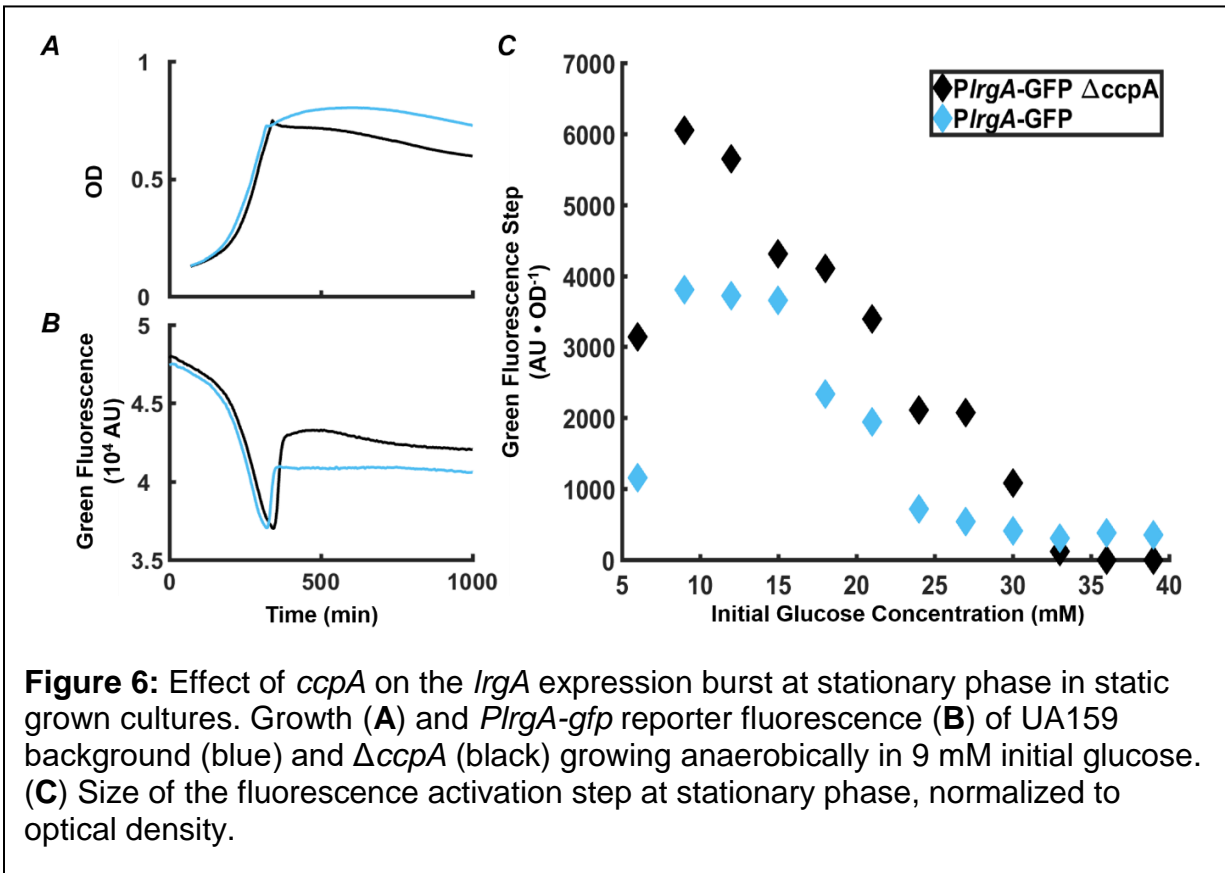

277 *Overexpression of lytST permits IrgA expression in aerobic media*

278 The LytST two component system is implicated in the regulation of *IrgAB*  
279 homologs, as for example in *B. subtilis* where *lytST* was linked to pyruvate sensing and  
280 shown to be required for expression of the *IrgA* homolog (8). Prior studies of *S. mutans*  
281 in static, bulk cultures showed that deletion of *lytS* (17) or *lytST* (11) abolished the  
282 stationary phase expression of *IrgAB*. Therefore, we did not attempt to activate *IrgAB* in  
283 a *lytST* deletion strain under microfluidic conditions. However, we did test whether  
284 overexpression of *lytST* affects the expression of *IrgAB* under microfluidic flow.

285 We loaded a *lytST* overexpression strain harboring the *PlrgA-gfp* reporter into  
286 microfluidic channels as above. Figure 7A shows the response of cells that were provided  
287 aerobic (air-equilibrated) defined medium containing 2 mM glucose and 10 mM pyruvate.

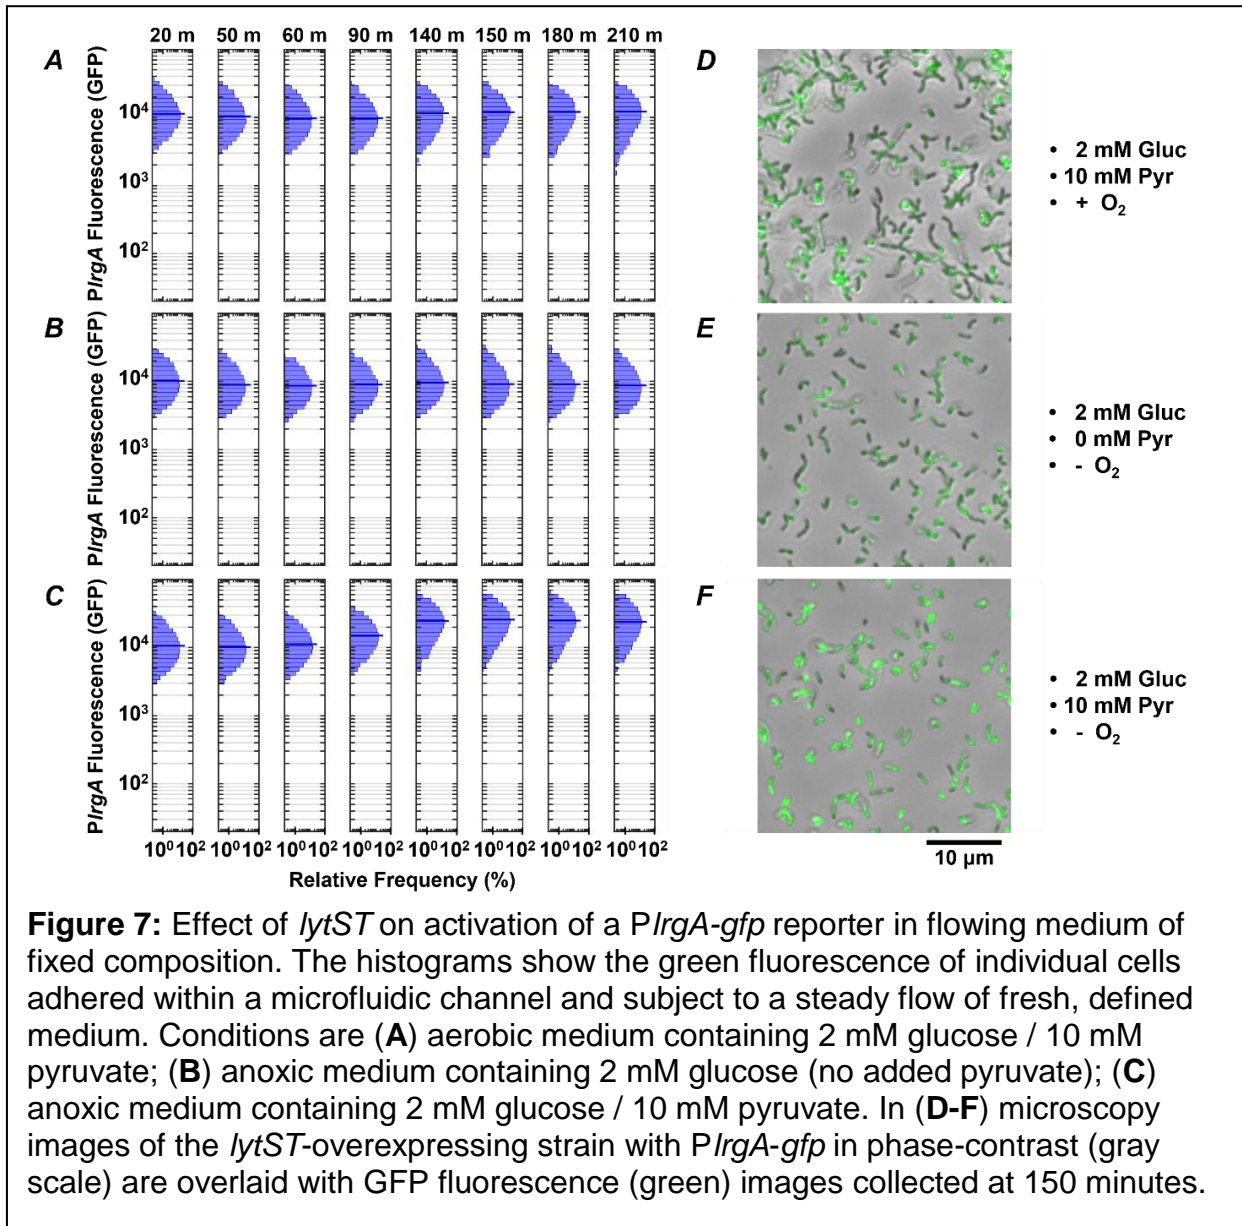

288 Expression of *IrgA* remained constant throughout the experiment but with a median  
289 fluorescence nearly 1.7 to 3.4 fold greater than wild type cells in a similar but

290 deoxygenated medium (in Figures 5B and 5D). Therefore, the overexpression of *lytST*  
291 bypasses the *IrgA* requirement for rigorous deoxygenation.

292 We tested whether pyruvate was needed to activate the *IrgA* reporter in the *lytST*  
293 overexpressing strain. Figure 7B shows that *IrgA* activated in anoxic medium containing  
294 2 mM glucose lacking added pyruvate. Robust expression of *IrgA* was nearly identical to  
295 Figure 7A. We also tested activation of *IrgA* in anoxic medium with 2 mM glucose and 10  
296 mM added pyruvate (Figure 7C) which were necessary to activate *IrgA* in the UA159  
297 background. After 90-140 minutes of flow, expression of *IrgA* increased to about 2-fold  
298 greater than in Figures 7A and 7B. Figures 7D-7F show cells with activated *IrgA* reporters  
299 (green). These data show that although *lytST* overexpression does alleviate the  
300 requirement for anoxic conditions in activating *IrgA*, it does not entirely eliminate  
301 sensitivity to external pyruvate.

302 Finally, the population distribution of individual cell fluorescence in the *lytST*  
303 overexpression strain was observed to be slightly narrower than in the UA159  
304 background, Figures 5B and 5D.

305

## 306 Discussion

307 The *cidAB* and *IrgAB* operons were first identified as a putative holin-antiholin  
308 system in *Staphylococcus aureus*, with gene products that control extracellular murein  
309 hydrolase activity (3-5, 7). The *S. aureus IrgAB* operon is activated differentially through  
310 the growth curve, with the largest number of RNA transcripts detected during the  
311 transition from exponential to stationary phase (3, 7). Studies of *S. mutans IrgAB* have  
312 found generally similar patterns of expression (11, 22), although these transcriptional

313 studies have not yielded a precise determination of the environmental cues that control  
314 the operon. By combining a fluorescent gene reporter for *IrgA* with single cell observations  
315 and microfluidic control of growth media conditions, we obtained a more detailed  
316 understanding of the environmental signals that trigger *IrgAB* in early stationary phase.

317 Several previous studies (11, 22) showed that higher glucose concentrations  
318 suppress *IrgAB* expression, and a recent study found a binding site for the catabolite  
319 repressor protein CcpA on the *IrgA* promoter region (22). The fact that *IrgA*, like many  
320 other virulence-linked genes in *S. mutans*, is regulated by catabolite repression via CcpA  
321 (33) could potentially explain the burst of *IrgA* expression at the end of exponential growth.  
322 However, our data imply that a different input must play the dominant role in suppressing  
323 *IrgA* during the exponential phase. Deletion of *ccpA* did not affect the timing of the  
324 expression burst (Figure 6), and it had only a modest, qualitative effect on the level of that  
325 expression, increasing it less than two fold (18).

326 By contrast, molecular oxygen was found to exert decisive control over the *IrgA*  
327 burst. No combination of glucose/pyruvate concentrations was found to activate *IrgA* in  
328 cells that were growing in a continuous flow of fresh, defined medium, unless that medium  
329 was rigorously deoxygenated. In deoxygenated medium, robust *IrgA* expression occurred  
330 even though the composition of the medium (FMC medium containing added pyruvate)  
331 was otherwise compatible with normal, exponential growth. This finding suggests that the  
332 population-wide, tightly synchronized burst of *IrgA* expression observed in static, bulk  
333 cultures at stationary phase is not triggered by an internal state of the bacteria, or by  
334 accumulation of pyruvate or depletion of nutrients from the media, but rather by  
335 exhaustion of molecular oxygen. Exhaustion of oxygen is presumably an all-or-nothing

336 signal that occurs at a well-defined time point during the growth curve, unlike the gradual  
337 accumulation of a waste product or a quorum sensing signal.

338 A previous *S. mutans* study reported that *IrgAB* was upregulated when grown  
339 aerobically in static, bulk cultures (2). That study used a microarray analysis to compare  
340 total RNA between aerobic and anaerobic cultures of *S. mutans* during mid-exponential  
341 phase (optical density of 0.4 at 600 nm) (2). A followup study similarly reported that *IrgAB*  
342 expression at stationary phase was much more pronounced when grown aerobically  
343 compared to low-oxygen growth (17). Our present study differs from these two earlier  
344 studies in some key respects. One is that our use of a fluorescent reporter allows us to  
345 characterize the large burst of *IrgAB* activity that occurs within a very narrow temporal  
346 window at stationary phase, which may be missed in the transcriptional study. Oxygen  
347 concentration could potentially also affect RNA stability. In addition, the low-oxygen  
348 conditions in (2) and (17) are less well defined than in the present study. For example the  
349 low-oxygen condition in (17) consisted of growth in 5% CO<sub>2</sub>, which is not equivalent to  
350 the stringently anaerobic condition achieved here through the use of an enzymatic oxygen  
351 scavenger. Our data clearly show that a high level of control over oxygen concentration,  
352 in addition to high time resolution, are both necessary in order to characterize *IrgA* activity  
353 early in stationary phase.

354 The mechanism by which oxygen represses *IrgAB* is not known, although the  
355 VicRK two component system is a potential candidate that has been shown to influence  
356 *IrgAB* expression (18). VicRK has also been linked to oxidative stress tolerance in *S.*  
357 *mutans* (24, 25, 34) and VicK is regarded as a potential sensor of oxygen or redox  
358 conditions (35). Consistent with this interpretation, a transcriptional study found that

359 deletion of *vicK* led to moderate increase in exponential phase expression of *IrgA*, but a  
360 nearly 100-fold decrease in stationary phase expression (18).

361 LytST has also been identified as a potential intermediate between molecular  
362 oxygen and *IrgA* (11, 17). However, LytST homologs in other organisms have recently  
363 been identified as sensors of extracellular pyruvate. In *E. coli* two component systems of  
364 the LytS/LytTR family have been identified as a receptors for external pyruvate (36, 37),  
365 and a LytST-regulated system is triggered by extracellular pyruvate (32). In *B. subtilis*  
366 both *lytST* and the *IrgA* homologs, *ysbA* and *pftA*, were shown to be essential for pyruvate  
367 utilization (8). As in *S. mutans*, *B. subtilis* *ysbA* activates at the onset of stationary phase  
368 and decreases its expression with increasing initial glucose concentrations due to  
369 regulation by CcpA (8, 9). The *ysbAB* (or *pftAB*) operon is induced by LytST in the  
370 presence of extracellular pyruvate (9). That study reported that PftA and PftB form a  
371 hetero-oligomer that functions as a pyruvate-specific facilitated transporter and, together  
372 with LytST, help to adapt to a changing environment when the preferred carbon sources  
373 have been exhausted (9).

374 Certainly the LytST system is a key regulatory input to *IrgAB* expression in *S.*  
375 *mutans*, as deletion of *lytST* was previously shown to prevent stationary phase expression  
376 of *IrgAB* (11). In our studies a *lytST* overexpressing strain readily activated *IrgA*, even in  
377 the absence of pyruvate and in media that were not thoroughly deoxygenated. LytST  
378 overexpression eliminated the bursting character of *IrgA* expression and caused instead  
379 generally robust expression under aerobic and pyruvate-absent conditions where *IrgA*  
380 expression was absent in the wild type. These data indicate that *lytST* is not only required  
381 for activation of *IrgA*, but that it can overpower the repression signals due to molecular



382 oxygen. Interaction of LytST with the *cre1* site previously suggested that LytST may inhibit  
383 the action of CcpA, and therefore partially bypass catabolite repression as well (22).

384         The very brief duration of the *IrgA* expression burst at stationary phase may offer  
385 an intriguing clue to the mechanisms of its regulation, as it suggests a self-limiting  
386 behavior. In the *B. subtilis* study above, induction of the *IrgAB* homolog *ysbAB* (*pftAB*)  
387 increased as pyruvate increased up to 1 mM but was also inhibited via LytST under  
388 excess pyruvate conditions (9), suggesting that an influx of pyruvate led to inhibition. One  
389 may speculate that if expression of *S. mutans IrgA* triggers a pyruvate influx that  
390 suppresses further *IrgA* expression, then the temporal profile of *IrgA* activity in response  
391 to extracellular pyruvate would appear as a rapid burst as is observed here. In that case,  
392 if pyruvate can also enter the cell by another pathway (unrelated to *IrgAB* and LytST),  
393 then very high concentrations of extracellular pyruvate would be expected to suppress  
394 *IrgAB* activity, as is observed. A pyruvate-dependent self-limiting mechanism of this type  
395 is consistent with findings that overexpression of *IrgAB* from a plasmid led to upregulation  
396 of *IrgAB* during exponential phase but downregulation of *IrgAB* during stationary phase  
397 (18).

398         It is an interesting property of *IrgAB* that its activation (and subsequent  
399 deactivation) in a bulk culture is tightly synchronized temporally in the population, and yet  
400 the level of expression (as indicated by GFP concentration) is variable in individual cells.  
401 Although some of the cell-to-cell heterogeneity seen in *S. mutans* fluorescent protein  
402 expression can probably be attributed to the use of plasmid-based reporters (38) the  
403 heterogeneity we observe in *IrgA* expression cannot be due entirely to the plasmid  
404 reporter. When cells drawn from a static culture activate *IrgA*, the population distribution



405 in fluorescence is broad with a strongly bimodal character (Figure 4C). This bimodality is  
406 highlighted in Figures 8A and 8B, which represent each of the *IrgA*-active, single-cell  
407 histograms as the sum of two gamma probability distributions. (The gamma distribution  
408 is characteristic of stochastic gene expression (39)) The relative areas under the two  
409 distributions indicate that roughly 82% of cells are *IrgA*-active (high fluorescence) at 9 h,  
410 and about 95% are *IrgA*-active at 10 h. By contrast, *IrgA* expression under microfluidic  
411 flow (Figures 5B, 5D) lacks this bimodal character, producing virtually unimodal  
412 histograms ( $\geq 98\%$  *IrgA*-active) in the same mathematical representation (Figure 8C, 8D).  
413 This finding indicates that, when environment conditions are sufficiently uniform as in the  
414 microfluidic study, a robust and generally similar level of *IrgA* expression is observed  
415 population-wide. Therefore, local differences or gradients in key parameters such as  
416 pyruvate, oxygen or glucose may explain some of the heterogeneity that was observed  
417 in our static culture studies, and also in the individual cell expression of the *IrgA* homolog  
418 *ysbA* in *B. subtilis* (8).

419 The presence of heterogeneity without bimodality in our microfluidic data also  
420 implies that *IrgAB* is regulated in an open-loop mechanism, without benefit of the positive  
421 transcriptional feedback that is typically associated with bimodality in gene expression  
422 (40). Rather, a mechanism of activation by *LytST* followed by negative feedback via  
423 intracellular pyruvate, as hypothesized above (Figure 8E), may be sufficient to control  
424 *IrgAB*, as it allows both an on-switch and an off-switch. We note that the histogram of  
425 single-cell fluorescence is markedly narrower for the *lytST* overexpressing strain (Figure  
426 7A) than for the wild type background (Figure 5D), suggesting that *lytST* overexpression

427 is a strong enough stimulus that it brings *IrgA* expression closer to saturation and reduces  
 428 the heterogeneity that is normally present.

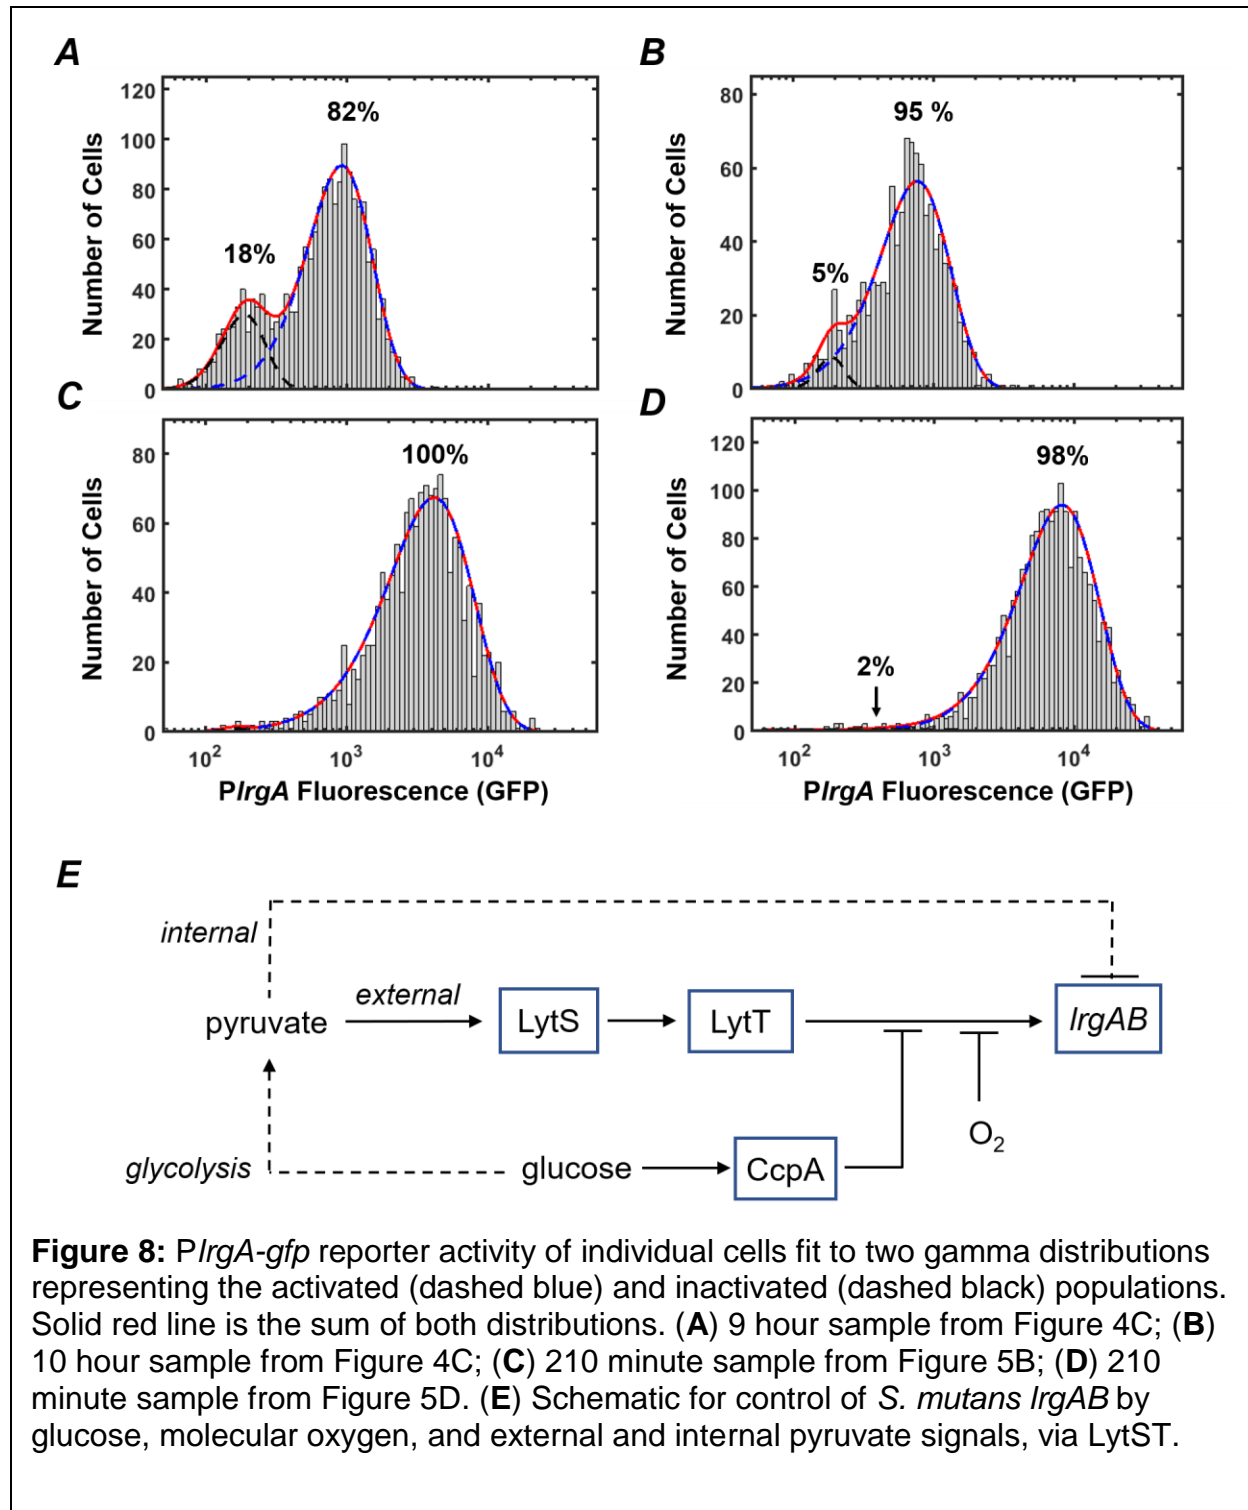

429 Finally, our study has not identified a pathway by which *cidAB* modulates *IrgAB*  
430 expression. These two operons exhibit a complex pattern of transcriptional cross  
431 regulation that is growth phase dependent, indicative of interactions between different  
432 gene products within both operons. It is likely not as simple as mutual repression (18).  
433 Future studies of *cidAB* activation may begin to shed light on how the two operons  
434 interact.

### 435 **Acknowledgments**

436 The authors acknowledge funding support from the NIDCR through awards R01  
437 DE025237 and R01 DE023339.

438

### 439 **Methods**

#### 440 *Bacterial strains, plasmids and growth conditions*

441 Observing the effects of pyruvate and glucose on *IrgA* in *S. mutans* was possible  
442 through a *gfp* fusion to the promoter region of *IrgAB*, which was inserted into the pDL278  
443 shuttle vector (carrying spectinomycin resistance) as described in (22). The resulting  
444 plasmid was inserted into a wild-type UA159 and a *ccpA*-deficient mutant (41) to give the  
445 *P<sub>IrgA</sub>-gfp* and  $\Delta$ *ccpA/P<sub>IrgA</sub>-gfp* strains, respectively (22).

446 The *lytST* overexpression strain was constructed using the method described in  
447 (18). Briefly, a fragment containing the *ldh* promoter region (*P<sub>ldh</sub>*) and a polar kanamycin  
448 resistance gene ( $\Omega$ Km-*P<sub>ldh</sub>*) was used to replace the *lytST* promoter region: two 0.5 kb  
449 fragments surrounding the -35 and -10 regions of the *lytST* promoter were amplified and  
450 ligated to the  $\Omega$ Km-*P<sub>ldh</sub>* cassette and then transformed into *S. mutans*.

451 For studies of *P<sub>IrgA</sub>* activation in a well plate system, overnight cultures of *S.*  
452 *mutans* UA159 and its derivatives were incubated in complex medium BHI with 1 mg/ml  
453 spectinomycin to ensure plasmid homology at a temperature of 37 °C in an atmosphere  
454 composed of 5% CO<sub>2</sub>. Overnight cultures were washed twice in phosphate buffered  
455 saline (PBS) of pH 7.2. They were then diluted 1:100 into defined medium (FMC) pH  
456 corrected to 7.0 containing final concentrations of glucose and pyruvate dictated by the  
457 experiment conducted. Fresh cultures were allowed to grow to early exponential phase  
458 with an OD600 of 0.1 before being followed by any further testing. For single cell studies  
459 as well as studies under a flow environment, overnight cultures of *S. mutans* were grown  
460 in BHI supplemented with an additional 20 mM glucose to ensure no activation of *IrgA*.  
461 Overnight cultures were washed twice in PBS and diluted 1:35 in fresh FMC before  
462 allowed to incubate to an OD600 of 0.1.

463 *Measuring growth and gene activation in bulk.*

464 The data seen in Figures 1 – 3, 6 was measured using a BioTek Synergy 2  
465 multimode plate reader. Overnight samples were first diluted 100-fold into fresh FMC  
466 media with the prepared initial carbohydrates necessary for the experiment. Samples  
467 were grown to an OD600 of 0.1 in prepared FMC media before being dispersed into 2 ml  
468 volumes (Figures 1,2,6) or 200 µl (Figure 3) on 24 or 96 well plates respectively. Samples  
469 were covered with a 410 µl mineral oil overlay to facilitate anaerobic growth on a 24 well  
470 plate and 75 µl on a 96 well plate. Aerobic growth was facilitated with no mineral oil  
471 overlay and the plate was set to shake for 10 seconds every two minutes. Cultures grew  
472 in the well plates for 24-35 h to reach well into stationary phase and its growth was

473 monitored by its optical density at 620 nm which was measured at 5 minute intervals.  
474 Fluorescence was monitored by a green filter at 485-520 nm.

#### 475 *Measuring IrgA activation from bulk*

476 The fluorescence increase seen at the onset of stationary phase was calculated  
477 by calculating the time derivative (slope) of the fluorescence curve obtained from the  
478 BioTek Synergy 2 and finding the time value at maximum slope. This time value  
479 corresponds to the inflection point of the fluorescence increase. An adjacent local  
480 minimum and maximum in the fluorescence are then found from the nearby time values  
481 at which the time derivative crosses zero. The difference between these maximum and  
482 minimum values is the fluorescence step at the onset of stationary phase. We then  
483 normalized this fluorescence step, dividing it by the optical density of the culture at its  
484 entry into stationary phase.

#### 485 *Slide Experiments*

486 Overnight cultures were diluted 1:35 fold into a 20 ml seed culture with an oil  
487 overlay inside an incubator maintaining a 5% CO<sub>2</sub> atmosphere at 37 °C. To take phase  
488 and fluorescence images, a 600 µl sample was collected into a cuvette from the seed  
489 culture and an OD600 measurement was taken. The same sample was then ultra-  
490 sonicated to break up the cell chains and 4 µl deposited on a glass coverslip. Phase  
491 contrast and fluorescence images of the slide were taken on a Nikon, TE2000U, inverted  
492 microscope together with a Photometric Prime camera and a green filter. Phase and  
493 fluorescence images were taken periodically throughout the full growth cycle of the culture  
494 until a stable, stationary phase optical density was reached. GFP concentration of

495 individual cells was assessed from microscopy images using a method described  
496 previously (42).

#### 497 *Microfluidic Design*

498 An ibidi  $\mu$ -slide VI (ibidi USA, Inc) was used to measure activation levels of PlrgA  
499 under flow of medium at set rates. The ibidi slide consisted of 6 flow channels that had  
500 dimensions of 0.1 x 1 x 17 mm for a total volume of 1.7  $\mu$ l. Each of these rectangular  
501 channels had allowed viewing through a microscope. Each channel had an inlet and an  
502 outlet that fit a standard luer fitting which allowed solutions of the desired media to be  
503 pumped through the flow channels. The ibidi  $\mu$ -slide was secured to the stage of a Nikon,  
504 TE2000U, inverted microscope that is housed inside a temperature controlled Lexon  
505 chamber. While data was collected, the chamber was maintained at a constant 37 °C by  
506 an electronic temperature controller.

#### 507 *Microfluidic Experiments*

508 We cultured *S. mutans* PlrgA-gfp cells in defined (FMC) medium containing initially  
509 10 mM glucose and grew them to 0.3-0.4 OD. We then sonicated the cells to break apart  
510 chains and loaded the cells into microfluidic flow channels (1.7  $\mu$ L volume per flow  
511 channel, 100  $\mu$ m channel depth, six independent channels per flow device, Ibidi GmbH).  
512 Cells were allowed to settle onto the lower window of the channel for 20 minutes, while  
513 the channel was mounted onto an inverted microscope in a temperature-controlled  
514 chamber. A flow of fresh medium was then supplied into the channels by a syringe pump  
515 at a rate of 1000  $\mu$ l/h for 30 minutes to replace and refresh the medium in the channels,

516 connections and fittings. After the 30 minute purge, the pump rate was reduced to 20  $\mu$ l/h  
517 and held constant for the duration of the experiment.

518 To ensure that the growth media for the microfluidic studies was fully  
519 deoxygenated, we added an oxygen scavenging system consisting of 2 U/ml glucose  
520 oxidase and 120 U/ml catalase (43). This enzymatic system rapidly consumes  $O_2$  from  
521 the medium by breaking down glucose to yield gluconic acid and  $H_2O$  as products.  
522 Although the glucose oxidase generates  $H_2O_2$  as an intermediate product (which is then  
523 broken down by the catalase), *S. mutans* is tolerant of low to moderate concentrations of  
524  $H_2O_2$  far higher than would be present during this reaction (31).

525

526 **References**

- 527 1. **Loesche WJ.** 1986. Role of *Streptococcus mutans* in human dental decay. Microbiol  
528 Rev **50**:353-380.
- 529 2. **Ahn S, Wen ZT, Burne RA.** 2007. Effects of oxygen on virulence traits of  
530 *Streptococcus mutans*. J Bacteriol **189**:8519-8527.
- 531 3. **Groicher KH, Firek BA, Fujimoto DF, Bayles KW.** 2000. The *Staphylococcus*  
532 *aureus* *IrgAB* Operon Modulates Murein Hydrolase Activity and Penicillin Tolerance. J  
533 Bacteriol **182**:1794-1801.
- 534 4. **Rice KC, Bayles KW.** 2003. Death's toolbox: examining the molecular components  
535 of bacterial programmed cell death. Mol Microbiol **50**:729-738.
- 536 5. **Rice KC, Firek BA, Nelson JB, Yang S, Patton TG, Bayles KW.** 2003. The  
537 *Staphylococcus aureus* *cidAB* Operon: Evaluation of Its Role in Regulation of Murein  
538 Hydrolase Activity and Penicillin Tolerance. J Bacteriol **185**:2635-2643.
- 539 6. **Bayles KW.** 2007. The biological role of death and lysis in biofilm development.  
540 Nature Reviews Microbiology **5**:721.
- 541 7. **Brunskill EW, Bayles KW.** 1996. Identification of LytSR-regulated genes from  
542 *Staphylococcus aureus*. J Bacteriol **178**:5810-5812.
- 543 8. **van deE, Kovács ÁT, Kuipers OP.** 2017. YsbA and LytST are essential for pyruvate  
544 utilization in *Bacillus subtilis*. Environmental Microbiology **19**:83-94.



- 545 **9. Charbonnier T, Le Coq D, McGovern S, Calabre M, Delumeau O, Aymerich S,**  
546 **Jules M.** 2017. Molecular and Physiological Logics of the Pyruvate-Induced Response  
547 of a Novel Transporter in *Bacillus subtilis*. *mBio* **8**..
- 548 **10. van den Esker MH, Kovács ÁT, Kuipers OP.** 2017. From Cell Death to  
549 Metabolism: Holin-Antiholin Homologues with New Functions. *mBio* **8**..
- 550 **11. Ahn S, Rice KC, Oleas J, Bayles KW, Burne RA.** 2010. The *Streptococcus*  
551 *mutans* Cid and Lrg systems modulate virulence traits in response to multiple  
552 environmental signals. *Microbiology* **156**:3136-3147.
- 553 **12. Young R, Bläsi U.** 1995. Holins: form and function in bacteriophage lysis. *FEMS*  
554 *Microbiol Rev* **17**:195-205.
- 555 **13. Young R.** 2002. Bacteriophage Holins: Deadly Diversity. *Journal of Molecular*  
556 *Microbiology and Biotechnology* **4**:21-36.
- 557 **14. Young R.** 1992. Bacteriophage lysis: mechanism and regulation. *Microbiol Rev*  
558 **56**:430-481.
- 559 **15. Saier, Milton H., Jr, Reddy BL.** 2015. Holins in bacteria, eukaryotes, and archaea:  
560 multifunctional xenologues with potential biotechnological and biomedical applications. *J*  
561 *Bacteriol* **197**:7-17.
- 562 **16. Pang T, Fleming TC, Pogliano K, Young R.** 2013. Visualization of pinholin lesions  
563 in vivo. *Proc Natl Acad Sci U S A* **110**:E2054-E2063.

- 564 17. **Ahn S, Qu M, Roberts E, Burne RA, Rice KC.** 2012. Identification of the  
565 *Streptococcus mutans* LytST two-component regulon reveals its contribution to  
566 oxidative stress tolerance. *BMC microbiology* **12**:187-187.
- 567 18. **Ahn S, Rice KC.** 2016. Understanding the *Streptococcus mutans* Cid/Lrg System  
568 through CidB Function. *Appl Environ Microbiol* **82**:6189-6203.
- 569 19. **Ahn S, Gu T, Koh J, Rice KC.** 2017. Remodeling of the *Streptococcus mutans*  
570 proteome in response to LrgAB and external stresses. *Scientific reports* **7**:14063;  
571 14063-14063.
- 572 20. **Rice KC, Turner ME, Carney OV, Gu T, Ahn S.** 2017. Modification of the  
573 *Streptococcus mutans* transcriptome by LrgAB and environmental stressors. *Microbial*  
574 *genomics* **3**:e000104; e000104-e000104.
- 575 21. **Chatfield CH, Koo H, Quivey, Robert G.** 2005. The putative autolysin regulator  
576 LytR in *Streptococcus mutans* plays a role in cell division and is growth-phase  
577 regulated. *Microbiology* **151**:625-631.
- 578 22. **Kim H, Waters A, Turner ME, Rice KC, Ahn S.** 2018. Regulation of *cid* and *Irg*  
579 expression by CcpA in *Streptococcus mutans*. *Microbiology* .
- 580 23. **Senadheera DB, Cordova M, Ayala EA, Chávez de Paz LE, Singh K, Downey**  
581 **JS, Svensäter G, Goodman SD, Cvitkovitch DG.** 2012. Regulation of bacteriocin  
582 production and cell death by the VicRK signaling system in *Streptococcus mutans*. *J*  
583 *Bacteriol* **194**:1307-1316.

- 584 24. **Ahn S, Burne RA.** 2007. Effects of oxygen on biofilm formation and the AtIA  
585 autolysin of *Streptococcus mutans*. J Bacteriol **189**:6293-6302.
- 586 25. **Deng DM, Liu MJ, ten Cate JM, Crielaard W.** 2007. The VicRK System of  
587 *Streptococcus mutans* Responds to Oxidative Stress. J Dent Res **86**:606-610.
- 588 26. **Shemesh M, Tam A, Kott-Gutkowski M, Feldman M, Steinberg D.** 2008. DNA-  
589 microarrays identification of *Streptococcus mutans* genes associated with biofilm  
590 thickness. BMC microbiology **8**:236-236.
- 591 27. **Bayles KW.** 2003. Are the molecular strategies that control apoptosis conserved in  
592 bacteria? Trends in Microbiology **11**:306-311.
- 593 28. **Bayles KW.** 2014. Bacterial programmed cell death: making sense of a paradox.  
594 Nature reviews.Microbiology **12**:63-69.
- 595 29. **Kobayashi K, Ogura M, Yamaguchi H, Yoshida K, Ogasawara N, Tanaka T,**  
596 **Fujita Y.** 2001. Comprehensive DNA microarray analysis of *Bacillus subtilis* two-  
597 component regulatory systems. J Bacteriol **183**:7365-7370.
- 598 30. **Terleckyj B, Willett NP, Shockman GD.** 1975. Growth of several cariogenic strains  
599 of oral streptococci in a chemically defined medium. Infect Immun **11**:649.
- 600 31. **De Furio M, Ahn SJ, Burne RA, Hagen SJ.** 2017. Oxidative Stressors Modify the  
601 Response of *Streptococcus mutans* to Its Competence Signal Peptides. Appl Environ  
602 Microbiol **83**:e01345-17.

- 603 32. Vilhena C, Kaganovitch E, Shin JY, Grünberger A, Behr S, Kristoficova I,  
604 Brameyer S, Kohlheyer D, Jung K. 2018. A Single-Cell View of the BtsSR/YpdAB  
605 Pyruvate Sensing Network in *Escherichia coli* and Its Biological Relevance. J Bacteriol  
606 **200**:e00536-17.
- 607 33. Abranches J, Nascimento MM, Zeng L, Browngardt CM, Wen ZT, Rivera MF,  
608 Burne RA. 2008. CcpA Regulates Central Metabolism and Virulence Gene Expression  
609 in *Streptococcus mutans*. J Bacteriol **190**:2340.
- 610 34. Senadheera MD, Lee AWC, Hung DCI, Spatafora GA, Goodman SD,  
611 Cvitkovitch DG. 2007. The *Streptococcus mutans* *vicX* Gene Product Modulates *gtfB/C*  
612 Expression, Biofilm Formation, Genetic Competence, and Oxidative Stress Tolerance. J  
613 Bacteriol **189**:1451.
- 614 35. Taylor BL, Zhulin IB. 1999. PAS domains: internal sensors of oxygen, redox  
615 potential, and light. Microbiology and molecular biology reviews : MMBR **63**:479-506.
- 616 36. Behr S, Kristoficova I, Witting M, Breland EJ, Eberly AR, Sachs C, Schmitt-  
617 Kopplin P, Hadjifrangiskou M, Jung K. 2017. Identification of a High-Affinity Pyruvate  
618 Receptor in *Escherichia coli*. Scientific reports **7**:1388; 1388-1388.
- 619 37. Behr S, Fried L, Jung K. 2014. Identification of a Novel Nutrient-Sensing Histidine  
620 Kinase/Response Regulator Network in *Escherichia coli*. J Bacteriol **196**:2023.

621 38. **Shields RC, Kaspar JR, Lee K, Underhill SAM, Burne RA.** 2019. Fluorescence  
622 tools adapted for real-time monitoring of the behaviors of *Streptococcus* species. Appl  
623 Environ Microbiol AEM.00620-19.

624 39. **Friedman N, Cai L, Xie XS.** 2006. Linking Stochastic Dynamics to Population  
625 Distribution: An Analytical Framework of Gene Expression. Phys Rev Lett **97**:168302.

626 40. **Dubnau D, Losick R.** 2006. Bistability in bacteria. Mol Microbiol **61**:564-572.

627 41. **Wen ZT, Burne RA.** 2002. Analysis of *cis*- and *trans*-Acting Factors Involved in  
628 Regulation of the *Streptococcus mutans* Fructanase Gene (*fruA*). J Bacteriol **184**:126.

629 42. **Kwak IH, Son M, Hagen SJ.** 2012. Analysis of gene expression levels in individual  
630 bacterial cells without image segmentation. Biochem Biophys Res Commun **421**:425-  
631 430.

632 43. **Englander SW, Calhoun DB, Englander JJ.** 1987. Biochemistry without oxygen.  
633 Anal Biochem **161**:300-306.

634

635

636 **Figure Legends**

637 **Figure 1:** *PlrgA-gfp* reporter fluorescence at the onset of stationary phase in *S. mutans*.  
638 Optical density of (A) UA159 background and (B) *PlrgA-gfp* strains growing in defined  
639 medium. Green fluorescence of (C) UA159 and (D) *PlrgA-gfp* cultures is dominated by  
640 the steadily declining fluorescence of the medium, until about 250-300 minutes. The black  
641 arrows in (D) mark the abrupt burst of fluorescence in the *PlrgA-gfp* strain at the onset of  
642 stationary phase. Comparison of the time derivatives of the green fluorescence for (E)  
643 UA159 and (F) *PlrgA-gfp* shows that the burst of *IrgA* expression has a duration of 30-50  
644 minutes. The inset in (F) shows the time derivative of reporter fluorescence for 10 mM  
645 glucose.

646  
647 **Figure 2:** Effect of anaerobic (A) and aerobic (B) growth on the step increase in *IrgA*  
648 activity at stationary phase in static cultures of the *PlrgA-gfp* strain. OD (black curves)  
649 and green fluorescence (blue curves) are shown for the reporter (solid curve) and UA159  
650 (dashed curve) strains growing in medium supplemented with 15 mM glucose. (C)  
651 Comparison of the step in *IrgA* activity for aerobic and anaerobic growth, versus initial  
652 glucose concentration. The increase in *IrgA* activity in the reporter strain is measured as  
653 the magnitude of the fluorescence step (black arrows in Figure 1D) above background,  
654 normalized to the optical density. No fluorescence step is detected in the aerobic cultures.  
655

656 **Figure 3:** Dependence of *IrgAB* expression step on initial pyruvate and glucose  
657 concentrations in cultures grown anaerobically. The increment in *Plrg-gfp* reporter

658 fluorescence (relative to baseline) at the onset of stationary phase is shown, normalized  
659 to the optical density.

660

661 **Figure 4:** Observation of *P<sub>IrgA</sub>-gfp* reporter activity in individual cells extracted from bulk,  
662 anaerobic cultures. Microscopy images of the reporter strain in phase-contrast (gray  
663 scale) are overlaid with GFP fluorescence (green) images at **(A)** 8 h and **(B)** 9 h of growth.  
664 **(C)** Histograms of individual cell GFP fluorescence measured at different times during  
665 growth. Fluorescence per cell is measured as described in (42). The length of each  
666 horizontal bar indicates the percentage of cells that fluoresced at the indicated level. The  
667 heavy horizontal line in each histogram indicates the median fluorescence of the  
668 population.

669

670 **Figure 5:** Effect of O<sub>2</sub>, glucose and pyruvate on a *P<sub>IrgA</sub>-gfp* reporter in flowing medium. The  
671 histograms show the green fluorescence of individual cells adhered within microfluidic  
672 channels and subject to a steady flow of fresh, defined medium: **(A)** aerobic medium  
673 containing 5 mM glucose / 10 mM pyruvate; **(B)** anoxic medium containing 5 mM glucose /  
674 10 mM pyruvate; **(C)** anoxic medium containing 2 mM glucose (no added pyruvate); **(D)**  
675 anoxic medium containing 2 mM glucose / 10 mM pyruvate; **(E)** anoxic medium containing  
676 12 mM glucose (no added pyruvate). **(F-J)** Microscopy images (collected at 150 minutes) of  
677 the reporter strain in phase-contrast (gray scale), overlaid with GFP fluorescence (green)  
678 images.

679

680 **Figure 6:** Effect of *ccpA* on the *IrgA* expression burst at stationary phase in static grown  
681 cultures. Growth **(A)** and *P<sub>IrgA</sub>-gfp* reporter fluorescence **(B)** of UA159 background (blue)

682 and  $\Delta ccpA$  (black) growing anaerobically in 9 mM initial glucose. (C) Size of the  
683 fluorescence activation step at stationary phase, normalized to optical density.

684

685 **Figure 7:** Effect of *lytST* on activation of a *P<sub>IrgA</sub>-gfp* reporter in flowing medium of fixed  
686 composition. The histograms show the green fluorescence of individual cells adhered  
687 within a microfluidic channel and subject to a steady flow of fresh, defined medium.  
688 Conditions are (A) aerobic medium containing 2 mM glucose / 10 mM pyruvate; (B) anoxic  
689 medium containing 2 mM glucose (no added pyruvate); (C) anoxic medium containing 2  
690 mM glucose / 10 mM pyruvate. In (D-F) microscopy images of the *lytST*-overexpressing  
691 strain with *P<sub>IrgA</sub>-gfp* in phase-contrast (gray scale) are overlaid with GFP fluorescence  
692 (green) images collected at 150 minutes.

693

694 **Figure 8:** *P<sub>IrgA</sub>-gfp* reporter activity of individual cells fit to two gamma distributions  
695 representing the activated (dashed blue) and inactivated (dashed black) populations.  
696 Solid red line is the sum of both distributions. (A) 9 hour sample from Figure 4C; (B) 10  
697 hour sample from Figure 4C; (C) 210 minute sample from Figure 5B; (D) 210 minute  
698 sample from Figure 5D. (E) Schematic for control of *S. mutans IrgAB* by glucose,  
699 molecular oxygen, and external and internal pyruvate signals, via *LytST*.

700



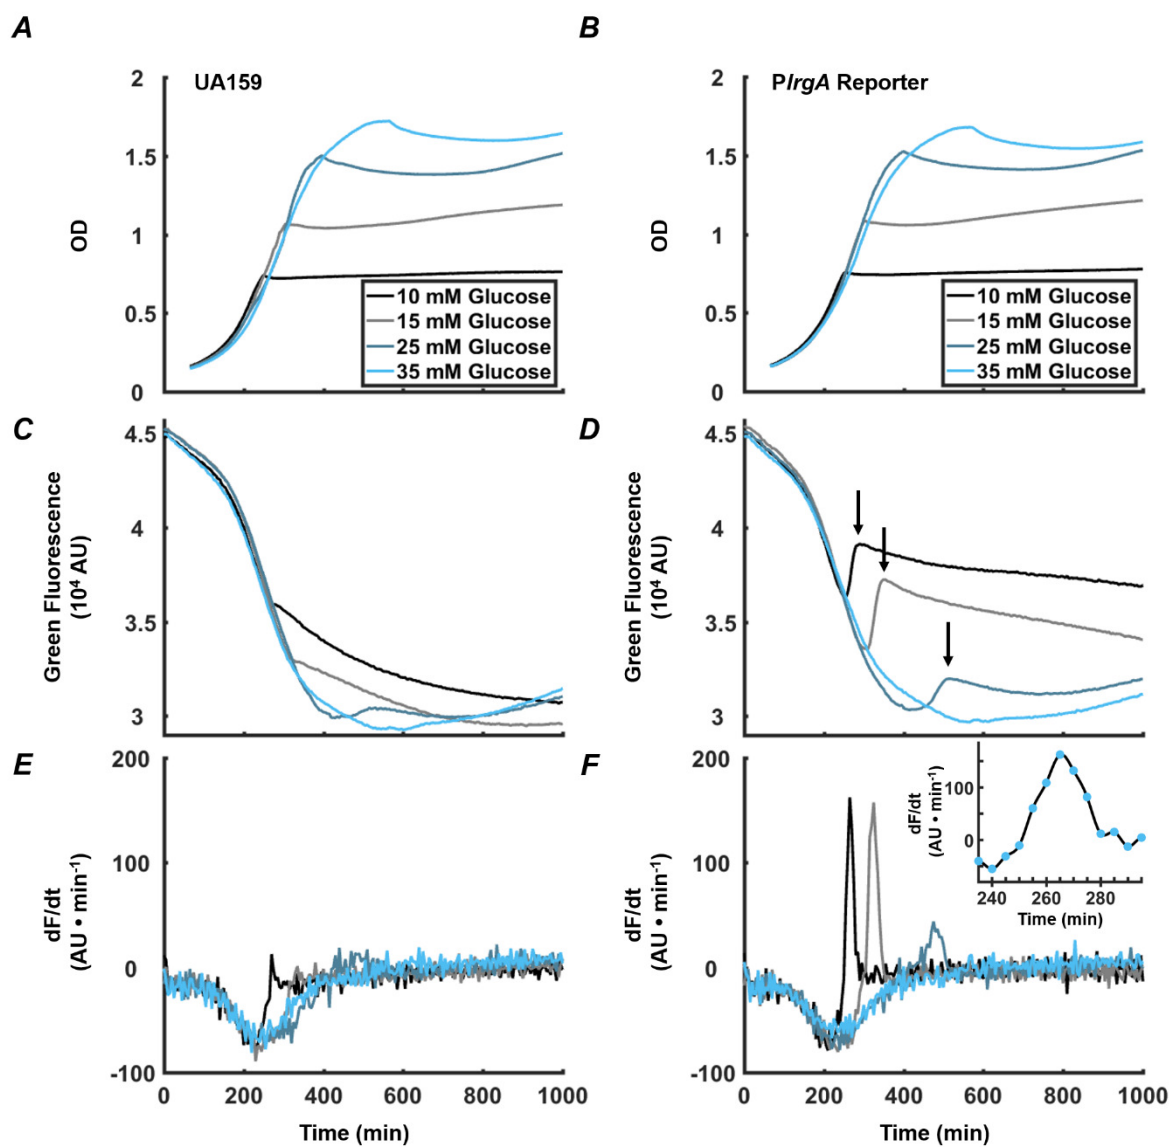

Figure 1

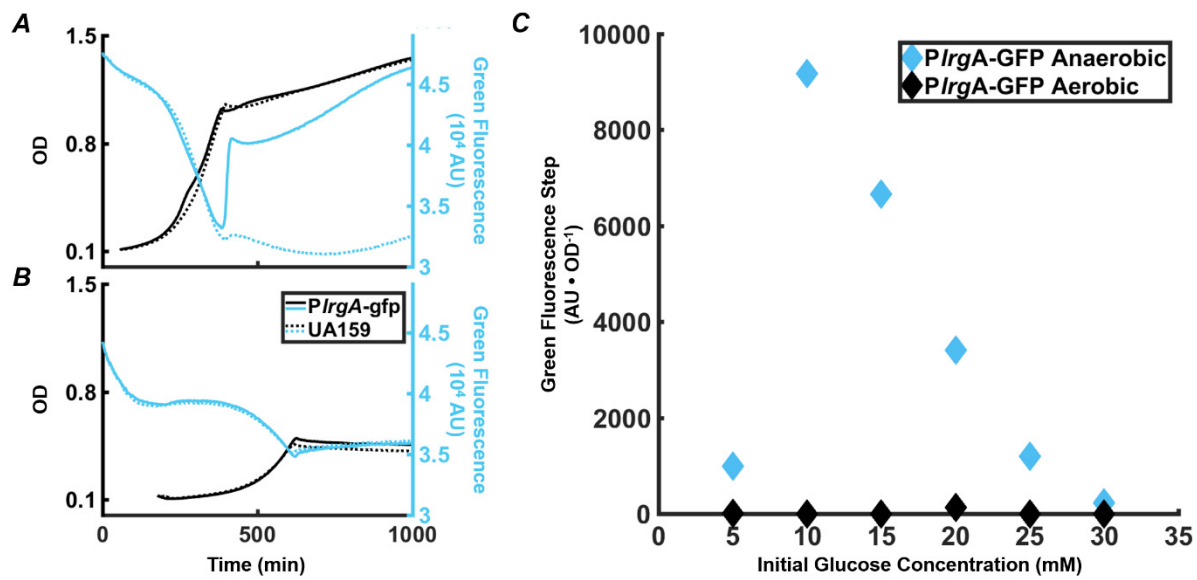

Figure 2

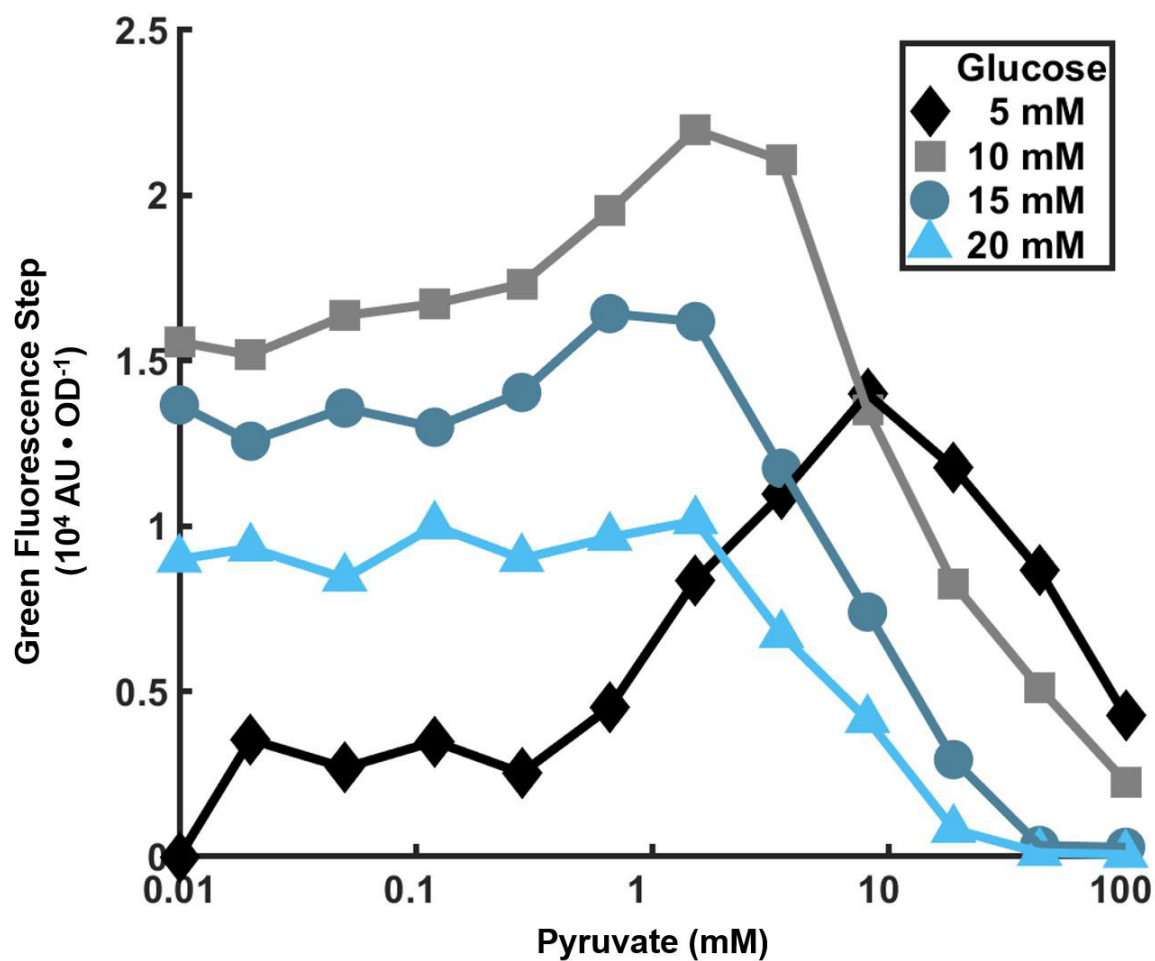

Figure 3

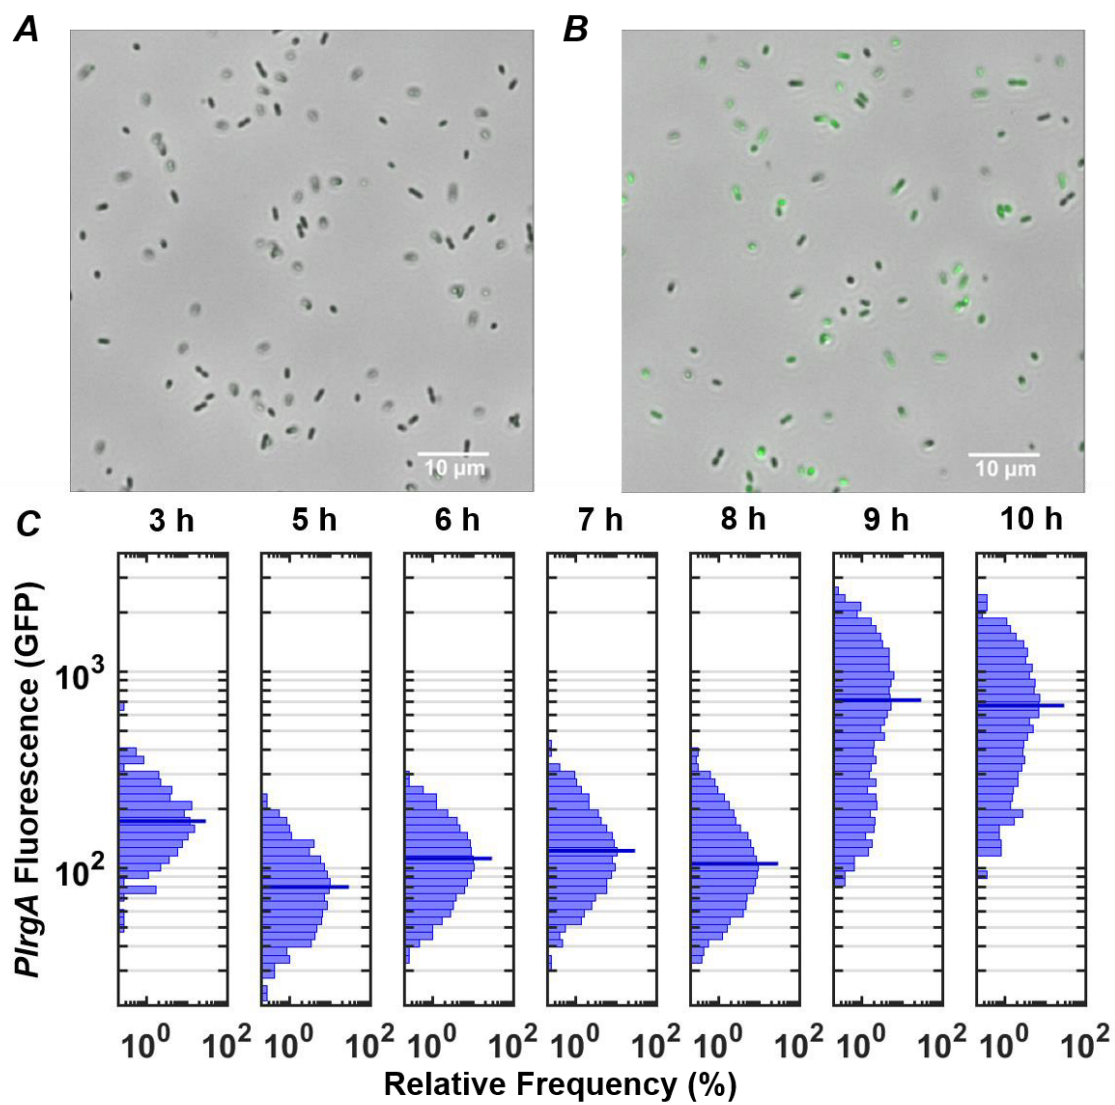

Figure 4

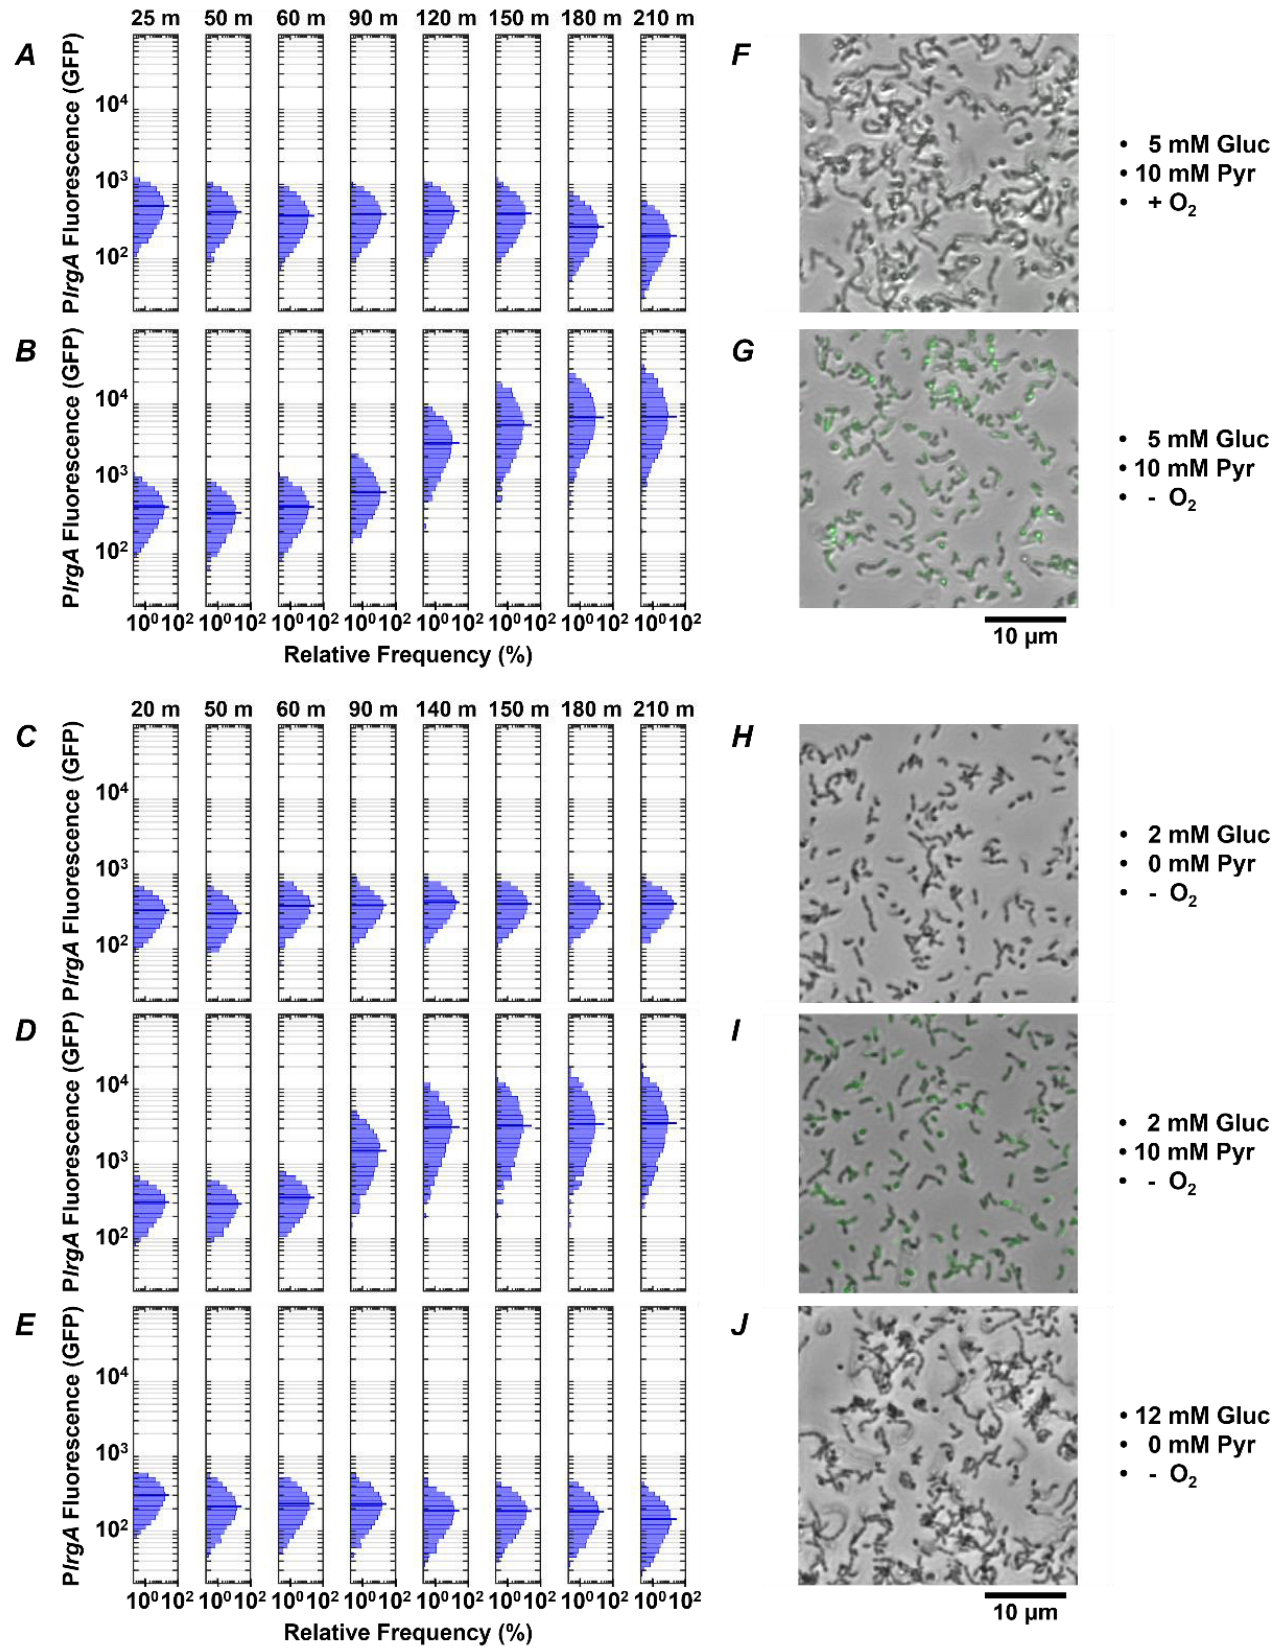

Figure 5

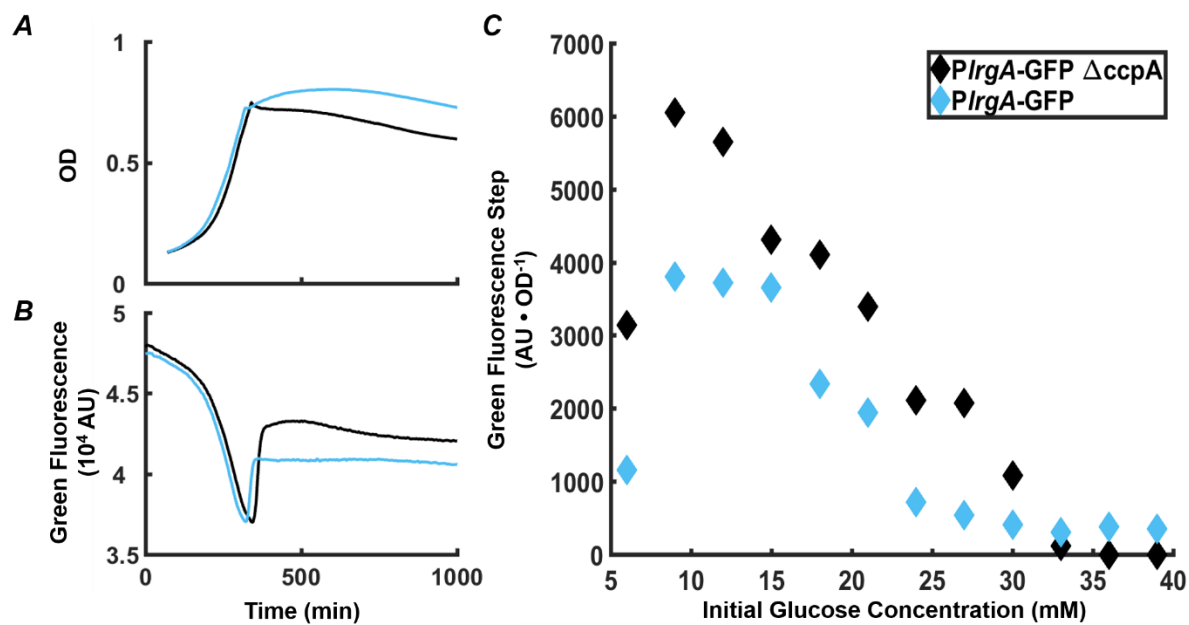

Figure 6



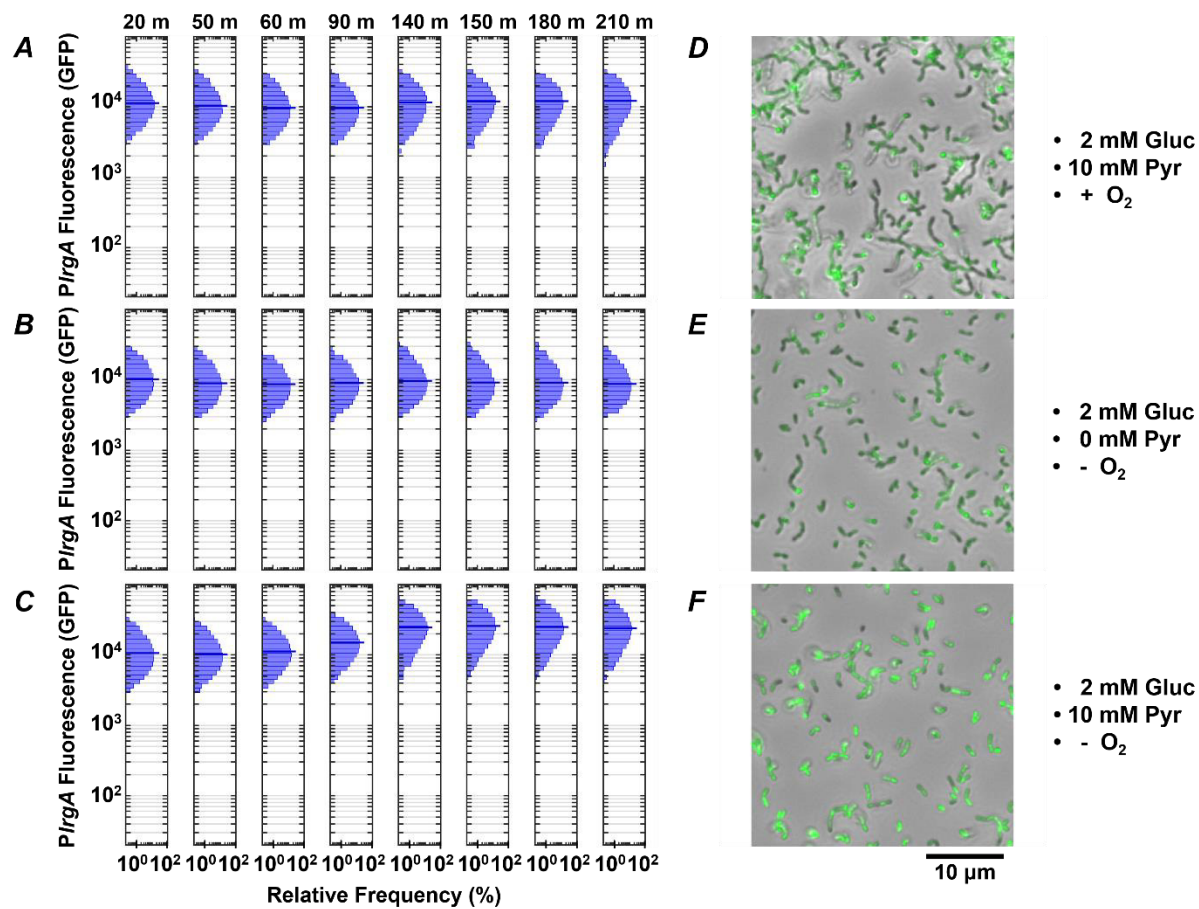

**Figure 7**

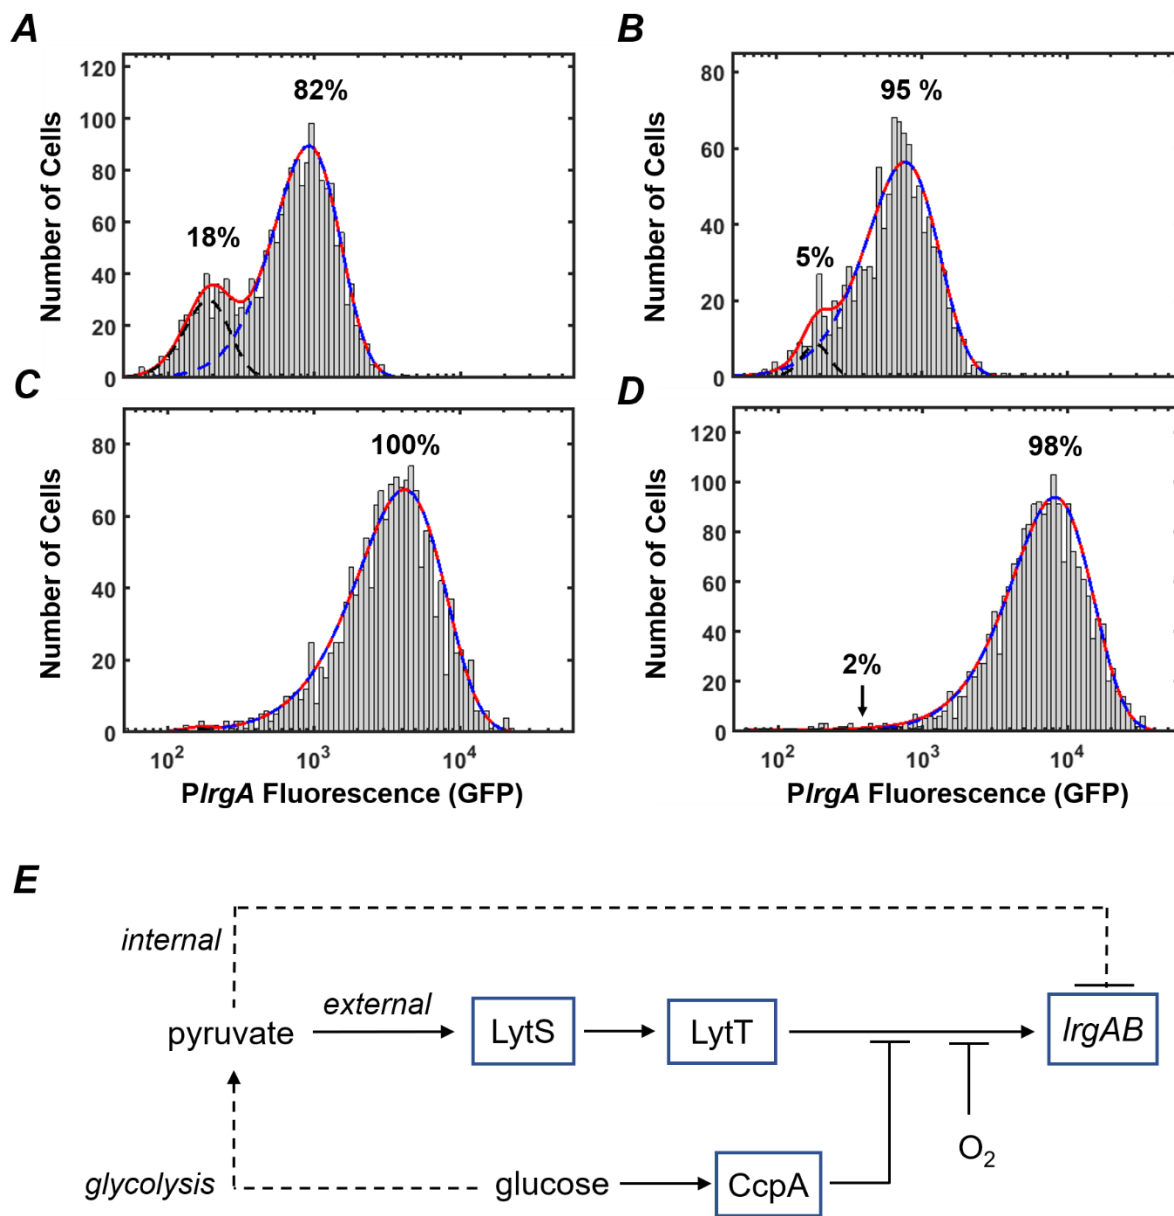

**Figure 8**
